# Supplementary material for: Cooperative B–H bond activation: dual site borane activation by redox active κ2-N,S-chelated complexes
Source: Royal Society of Chemistry journal article supplement (doi:10.1039/d2sc00907b), 2022-01-01
Supplement: d2sc00907b1.pdf [file d2sc00907b1.pdf]

## **Cooperative B-H bond activation: Dual sites borane activation by redox active $\kappa^2$ -N,S-chelated complexes**

Mohammad Zafar,<sup>†a</sup> Asif Ahmad,<sup>†a</sup> Suvam Saha,<sup>a</sup> Rongala Ramalakshmi,<sup>a</sup> Thierry Roisnel<sup>b</sup> and Sundargopal Ghosh<sup>\*a</sup>

<sup>a</sup>*Department of Chemistry, Indian Institute of Technology Madras, Chennai 600036, India. Tel: +91 44- 22574230; Fax: +91 44-22574202; E-mail: [sgghosh@iitm.ac.in](mailto:sgghosh@iitm.ac.in)*

<sup>b</sup>*Université de Rennes, CNRS, Institut des Sciences Chimiques de Rennes, UMR 6226, F-35000 Rennes, France*

<sup>†</sup> *These authors contributed equally to this work*

## Table of Contents

### I Experimental Details

#### I.1 Synthesis and Characterizations

#### I.2 Spectroscopic Details

|            |                                                                                                                                            |
|------------|--------------------------------------------------------------------------------------------------------------------------------------------|
| Figure S1  | Mass spectral isotopic distribution for the fragment of <i>mer-2a</i> .                                                                    |
| Figure S2  | Mass spectral isotopic distribution for the fragment of <i>mer-2b</i> .                                                                    |
| Figure S3  | Mass spectral isotopic distribution for the fragment of <i>fac-3a</i> .                                                                    |
| Figure S4  | Mass spectral isotopic distribution for the fragment of <i>fac-3b</i> .                                                                    |
| Figure S5  | Mass spectral isotopic distribution for the fragment of <i>fac-3c</i> .                                                                    |
| Figure S6  | Combined mass spectral isotopic distribution for the fragment of <i>trans-4</i> and <i>cis-4</i> .                                         |
| Figure S7  | EPR spectrum of <i>mer-2b</i> .                                                                                                            |
| Figure S8  | Cyclic voltammetry of <i>trans-mer-1a</i> , <i>mer-2a</i> , <i>fac-3a</i> , <i>trans-mer-1b</i> , <i>mer-2b</i> and <i>fac-3b</i> .        |
| Figure S9  | Comparison of UV-Vis/NIR spectra of <i>mer-2a-b</i> and <i>trans-mer-1a-b</i> in dichloromethane.                                          |
| Figure S10 | Combined $^1\text{H}$ and $^1\text{H}\{^{11}\text{B}\}$ NMR spectrum of <i>trans-mer-1b</i> .                                              |
| Figure S11 | $^1\text{H}$ NMR spectrum of <i>fac-3a</i> .                                                                                               |
| Figure S12 | Combined $^1\text{H}$ and $^1\text{H}\{^{11}\text{B}\}$ NMR spectrum of <i>fac-3a</i> .                                                    |
| Figure S13 | $^{11}\text{B}\{^1\text{H}\}$ NMR spectrum of <i>fac-3a</i> .                                                                              |
| Figure S14 | $^{13}\text{C}\{^1\text{H}\}$ NMR spectrum of <i>fac-3a</i> .                                                                              |
| Figure S15 | $^{31}\text{P}\{^1\text{H}\}$ NMR spectrum of <i>fac-3a</i> .                                                                              |
| Figure S16 | $^1\text{H}$ NMR spectrum of <i>fac-3b</i> .                                                                                               |
| Figure S17 | Combined $^1\text{H}$ and $^1\text{H}\{^{11}\text{B}\}$ NMR spectrum of <i>fac-3b</i> .                                                    |
| Figure S18 | $^{11}\text{B}\{^1\text{H}\}$ NMR spectrum of <i>fac-3b</i> .                                                                              |
| Figure S19 | $^{13}\text{C}\{^1\text{H}\}$ NMR spectrum of <i>fac-3b</i> .                                                                              |
| Figure S20 | $^{31}\text{P}\{^1\text{H}\}$ NMR spectrum of <i>fac-3b</i> .                                                                              |
| Figure S21 | $^1\text{H}$ NMR spectrum of <i>fac-3c</i> .                                                                                               |
| Figure S22 | Combined $^1\text{H}$ and $^1\text{H}\{^{11}\text{B}\}$ NMR spectrum of <i>fac-3c</i> .                                                    |
| Figure S23 | $^{11}\text{B}\{^1\text{H}\}$ NMR spectrum of <i>fac-3c</i> .                                                                              |
| Figure S24 | $^{13}\text{C}\{^1\text{H}\}$ NMR spectrum of <i>fac-3c</i> .                                                                              |
| Figure S25 | $^{31}\text{P}\{^1\text{H}\}$ NMR spectrum of <i>fac-3c</i> .                                                                              |
| Figure S26 | Combined $^1\text{H}$ NMR spectrum of <i>trans-4</i> and <i>cis-4</i> .                                                                    |
| Figure S27 | Combined $^{11}\text{B}\{^1\text{H}\}$ NMR spectrum of <i>trans-4</i> and <i>cis-4</i> .                                                   |
| Figure S28 | Combined $^{13}\text{C}\{^1\text{H}\}$ NMR spectrum of <i>trans-4</i> and <i>cis-4</i> .                                                   |
| Figure S29 | $\pi$ - $\pi$ stacking of mercatobenzothiazolyl rings in <i>mer-2a</i> .                                                                   |
| Figure S30 | UV-Vis absorption spectra of <i>trans-mer-1a-b</i> , <i>mer-2a-b</i> and <i>fac-3a-b</i> in dichloromethane.                               |
| Figure S31 | Cyclic voltammetry (CV) curve of complex <i>mer-2a</i> at different scan rates.                                                            |
| Figure S32 | Plot of cathodic and anodic peak current vs square root of scan rate for the first redox reversible wave couple of complex <i>mer-2a</i> . |
| Figure S33 | Plot of cathodic and anodic peak current vs square root of scan rate for the third quasi-reversible wave couple of complex <i>mer-2a</i> . |
| Figure S34 | CV of mercaptobenzothiazole.                                                                                                               |
| Figure S35 | CV of dihydrobis(2-mercaptobenzothiazolyl) borate.                                                                                         |

#### I.3 X-ray Analysis Details

#### II. Computational Details

|          |                                                                                                                                                                |
|----------|----------------------------------------------------------------------------------------------------------------------------------------------------------------|
| Table S1 | Selected geometrical parameters and Wiberg bond indices (WBI) of <i>mer-2a-b</i> , <i>fac-3a-b</i> , <i>trans-4</i> and <i>cis-4</i> .                         |
| Table S2 | Calculated natural charges (q), natural valence population (Pop) and HOMO – LUMO gaps of <i>mer-2a-b</i> , <i>fac-3a-b</i> , <i>trans-4</i> and <i>cis-4</i> . |

|            |                                                                                                                                                                                                                                                              |
|------------|--------------------------------------------------------------------------------------------------------------------------------------------------------------------------------------------------------------------------------------------------------------|
| Table S3   | Experimentally observed and calculated $^{11}\text{B}$ chemical shifts of <i>fac-3a-b</i> , <i>trans-4</i> and <i>cis-4</i> .                                                                                                                                |
| Table S4   | Topological parameters at selected bond critical points (BCPs) in <i>mer-2a-b</i> , <i>fac-3a-b</i> , <i>trans-4</i> and <i>cis-4</i> .                                                                                                                      |
| Table S5   | Electronic transition configurations for <i>mer-2a-b</i> by TD-DFT calculations.                                                                                                                                                                             |
| Figure S36 | Calculated UV-Vis absorption spectra of <i>mer-2a</i> at CAM-B3LYP/LANL2DZ/6-31G(d,p) level.                                                                                                                                                                 |
| Figure S37 | Calculated UV-Vis absorption spectra of <i>mer-2b</i> at CAM-B3LYP/LANL2DZ/6-31G(d,p) level.                                                                                                                                                                 |
| Figure S38 | Natural bond orbital interaction between B-S bond (a,b) and B-H-Ru (c,d) in <i>fac-3b</i> (isovalue $\pm 0.04$ [ $\text{e}/\text{bohr}^3$ ] $^{1/2}$ ); (e) Contour-line map of the Laplacian of the electron density in the Ru-H-B plane of <i>fac-3b</i> . |
| Figure S39 | HOMO of oxidised form of <i>mer-2a</i> (a) and HOMO of oxidised form of <i>mer-2a</i> (b).                                                                                                                                                                   |
| Figure S40 | Optimized geometry of <i>mer-2a</i> .                                                                                                                                                                                                                        |
| Figure S41 | Optimized geometry of <i>mer-2b</i> .                                                                                                                                                                                                                        |
| Figure S42 | Optimized geometry of <i>fac-3a</i> .                                                                                                                                                                                                                        |
| Figure S43 | Optimized geometry of <i>fac-3b</i> .                                                                                                                                                                                                                        |
| Figure S44 | Optimized geometry of <i>trans-4</i> .                                                                                                                                                                                                                       |
| Figure S45 | Optimized geometry of <i>cis-4</i> .                                                                                                                                                                                                                         |

### III References

## I Experimental Details

### General procedure and instrumentations

All manipulations were conducted by using standard Schlenk line and glove box techniques under an atmosphere of dry argon. Solvents such as toluene, hexane and THF were distilled through Na/benzo-phenoneketyl and dichloromethane was dried over calcium hydride prior to use under argon. Chloroform-*d* was degassed by three freeze-thaw cycles, dried over calcium hydride for 12 h, and stored over 4 Å molecular sieves in a Young's ampoule under argon. Compounds  $[(\kappa^2\text{-}N,S\text{-}(\text{C}_7\text{H}_4\text{NS}_2)_2)_2\text{R}_3\text{PRu}\{\kappa^3\text{-}H,S,S'\text{-}H_2B\text{-}(\text{C}_7\text{H}_4\text{NS}_2)_2\}]$  (R = Cy, Ph),<sup>1</sup> mesityl borane,<sup>2</sup> were synthesized according to the literature procedures.<sup>1-2</sup> and other chemicals such as  $\text{BH}_3\cdot\text{SMe}_2$ ,  $\text{BH}_3\cdot\text{THF}$ , HBPIn, catecholborane, 9-Borabicyclo[3.3.1]nonane solution (9-BBN) were obtained commercially (Sigma Aldrich) and used as received. The external reference for the  $^{11}\text{B}$  NMR spectroscopy,  $[\text{Bu}_4\text{N}][(\text{B}_3\text{H}_8)]$  was synthesized according to the literature method.<sup>3</sup> The  $^1\text{H}$ ,  $^{11}\text{B}\{^1\text{H}\}$ ,  $^{13}\text{C}\{^1\text{H}\}$ , and  $^{31}\text{P}\{^1\text{H}\}$  NMR spectra were recorded on Bruker 400 and 500 MHz instruments. The residual solvent protons were used as reference ( $\delta$ , ppm, benzene- $d_6$ , 7.16,  $\text{CDCl}_3$ , 7.26, Toluene- $d_8$ , 7.09 ppm), while a sealed tube containing  $[\text{Bu}_4\text{N}][(\text{B}_3\text{H}_8)]$  in benzene- $d_6$  ( $\delta_B$ , ppm, -30.07) was used as an external reference for  $^{11}\text{B}\{^1\text{H}\}$  NMR spectra.  $^1\text{H}$  decoupled  $^{11}\text{B}\{^1\text{H}\}$  spectra of all compounds were processed with a backward linear prediction algorithm to remove the broad  $^{11}\text{B}\{^1\text{H}\}$  background signal of the NMR tube.<sup>4</sup> The preparative TLC was performed with Merck 105554 TLC silica gel 60 F254 and thickness of layer 250  $\mu\text{m}$  on aluminum sheets with 20x20 cm size. Mass spectra were carried out using Qtof Micro YA263 HRMS instrument and Bruker MicroTOF-II mass spectrometer in ESI ionization mode. UV-vis absorption spectra were gained from Jasco V-650 spectrometer. Infrared spectra were obtained on a Jasco FT/IR-1400 spectrometer.

### I.1 Synthesis and Characterizations

**Syntheses of *mer-2a* and *2b*:** In a flame-dried NMR tube *trans-mer-[[* $(\kappa^2\text{-}N,S\text{-}(\text{C}_7\text{H}_4\text{NS}_2)_2\text{C}_y)_3\text{PRu}\{\kappa^3\text{-}H,S,S'\text{-}H_2B\text{-}(\text{C}_7\text{H}_4\text{NS}_2)_2\}]$ ], **1a** (30 mg, 34  $\mu\text{mol}$ ) in 1.5 mL chloroform-*d* solvent and the solution kept in open air at room temperature. After 2 days standing at room temperature dark green solution was formed. The volatile components were removed under vacuum and remaining residue was extracted into  $\text{CH}_2\text{Cl}_2$ /hexane and passed through celite. After removal of the solvent, the residue was subjected to chromatographic work-up by using TLC plates. Elution with a *n*-hexane/ $\text{CH}_2\text{Cl}_2$  (70:30 v/v) yielded green solid *mer-2a* (18 mg, 62%).

Under similar reactions conditions, reaction of *trans-mer-[[* $(\kappa^2\text{-}N,S\text{-}(\text{C}_7\text{H}_4\text{NS}_2)_2\text{PPh}_3)_3\text{PRu}\{\kappa^3\text{-}H,S,S'\text{-}H_2B\text{-}(\text{C}_7\text{H}_4\text{NS}_2)_2\}]$ ], **1b** (30 mg, 33  $\mu\text{mol}$ ) yielded green solid *mer-2b* (16mg, 55%).

*mer-2a*: MS (ESI<sup>+</sup>): *m/z* calculated for  $[\text{C}_{39}\text{H}_{45}\text{N}_3\text{PRuS}_6 + \text{H}]^+$ : 881.0797, found 881.0789.

*mer-2b*: MS (ESI<sup>+</sup>): *m/z* calculated for  $[\text{C}_{39}\text{H}_{27}\text{N}_3\text{PRuS}_5 + \text{H}]^+$ : 862.9388, found 862.9324.

**Syntheses of *fac-3a* and *3b*:** In a flame-dried Schlenk tube, *mer-[[* $(\kappa^2\text{-}N,S\text{-}(\text{C}_7\text{H}_4\text{NS}_2)_2\text{C}_y)_3\text{PRu}\{\kappa^1\text{-}S\text{-}(\text{C}_7\text{H}_4\text{NS}_2)_2\}]$ ], **2a** (30 mg, 34  $\mu\text{mol}$ ) in 5 mL dry toluene was treated with excess  $\text{BH}_3\cdot\text{THF}$  at room temperature. The reaction mixture was allowed to stir at room temperature for 1h. The volatile components were removed under vacuum and the remaining residue was extracted into  $\text{CH}_2\text{Cl}_2$ /hexane and passed through Celite. After removal of the solvent, the residue was subjected to chromatographic work-up by using TLC plates. Elution with a *n*-hexane/ $\text{CH}_2\text{Cl}_2$  (80:20 v/v) mixture yielded yellow solid *fac-3a* (10 mg, 38%).

Under similar reactions conditions, reaction of *mer-[[* $(\kappa^2\text{-}N,S\text{-}(\text{C}_7\text{H}_4\text{NS}_2)_2\text{PPh}_3)_3\text{PRu}\{\kappa^1\text{-}S\text{-}(\text{C}_7\text{H}_4\text{NS}_2)_2\}]$ ], **2b** (30 mg, 34  $\mu\text{mol}$ ) with excess  $\text{BH}_3\cdot\text{THF}$  yielded yellow solid *fac-3b* (11 mg, 42%).

*fac-3a*: MS (ESI<sup>+</sup>): *m/z* calculated for  $[\text{C}_{32}\text{H}_{45}\text{B}_2\text{N}_2\text{PRuS}_5]^+$ : 772.1167, found 772.1165;  $^{11}\text{B}\{^1\text{H}\}$  NMR (160 MHz,  $\text{CDCl}_3$ , 22 °C):  $\delta$  -11.5 ppm (br, B);  $^1\text{H}$  NMR (500 MHz,  $\text{CDCl}_3$ , 22 °C):  $\delta$  7.87 (d, J = 8.2 Hz, 2H,  $\text{Ar}_{(\text{mbz})}$ ), 7.44 (t, J = 8.6 Hz, 4H,  $\text{Ar}_{(\text{mbz})}$ ), 7.37 (dd, J = 10.4, 8.0 Hz, 6H, Ar), 7.33 (d, J = 6.8 Hz, 2H,  $\text{Ar}_{(\text{mbz})}$ ), 7.29 (t, J = 8.1 Hz, 8H, Ar), 7.26 (d, J = 2.7 Hz, 1H, Ar), 2.97 (d, 2H, B-H<sub>t</sub>), 1.85-1.64 (m, 33H), -14.34 ppm (br, 2H, Ru-H-B);  $^{13}\text{C}\{^1\text{H}\}$  NMR (125 MHz,  $\text{CDCl}_3$ , 22 °C):  $\delta$  26.7- 36.7 (Cy), 116.0-133.6 (Ph), 144.6 (C-N), 193.7 (C=S) ppm;  $^{31}\text{P}\{^1\text{H}\}$  NMR (202 MHz,  $\text{CDCl}_3$ , 22 °C):  $\delta$  71.0 ppm; IR ( $\text{CH}_2\text{Cl}_2$ ):  $\tilde{\nu}$  = 2443 (B-H<sub>t</sub>), 1961  $\text{cm}^{-1}$  (B-H<sub>b</sub>).

*fac-3b*: MS (ESI<sup>+</sup>): *m/z* calculated for  $[\text{C}_{32}\text{H}_{27}\text{B}_2\text{N}_2\text{PRuS}_5 + \text{Na}]^+$ : 776.9660, found 776.9636;  $^{11}\text{B}\{^1\text{H}\}$  NMR (160 MHz,  $\text{CDCl}_3$ , 22 °C):  $\delta$  -10.1 ppm (br, B);  $^1\text{H}$  NMR (500 MHz,  $\text{CDCl}_3$ , 22 °C):  $\delta$  7.87 (d, J = 8.3 Hz, 1H,  $\text{Ar}_{(\text{mbz})}$ ), 7.43 (t, J = 7.4 Hz, 2H,  $\text{Ar}_{(\text{mbz})}$ ), 7.26 (d, J = 2.9 Hz, 3H,  $\text{Ar}_{(\text{mbz})}$ ), 3.01 (d, 2H, B-H<sub>t</sub>), -13.24 ppm (br, 1H, Ru-H-B);  $^{13}\text{C}\{^1\text{H}\}$  NMR (125 MHz,  $\text{CDCl}_3$ , 22 °C):  $\delta$  116.0-137.4 (Ph) 144.4 (C-N) 194.0 (C=S) ppm;  $^{31}\text{P}\{^1\text{H}\}$  NMR (202 MHz,  $\text{CDCl}_3$ , 22 °C):  $\delta$  60.9 ppm; IR ( $\text{CH}_2\text{Cl}_2$ ):  $\tilde{\nu}$  = 2403 (B-H<sub>t</sub>), 1991  $\text{cm}^{-1}$  (B-H<sub>b</sub>).

**Syntheses of *fac-3c*:** In a flame-dried Schlenk tube, *cis-fac-[[* $(\kappa^2\text{-}N,S\text{-}(\text{C}_5\text{H}_4\text{NS})\text{Ph})_3\text{PRu}\{\kappa^3\text{-}H,S,S'\text{-}H_2B\text{-}(\text{C}_5\text{H}_4\text{NS})_2\}]$ ], *cis-fac-1a* (50 mg, 70  $\mu\text{mol}$ ) in 10 mL dry toluene was treated with excess  $\text{BH}_3\cdot\text{THF}$  at room temperature. The reaction mixture was allowed to stir at room temperature for 2h. The volatile components were removed under vacuum and the remaining residue was extracted into  $\text{CH}_2\text{Cl}_2$ /hexane and passed through Celite. After removal of the solvent, the residue was subjected to chromatographic work-up by using TLC plates. Elution with a *n*-hexane/ $\text{CH}_2\text{Cl}_2$  (75:25 v/v) mixture yielded yellow solid *fac-3c* (18 mg, 39%).

*fac-3c*: MS (ESI<sup>+</sup>): *m/z* calculated for [C<sub>28</sub>H<sub>27</sub>B<sub>2</sub>N<sub>2</sub>PRuS<sub>3</sub>]<sup>+</sup>: 642.0321, found 642.0321; <sup>11</sup>B{<sup>1</sup>H} NMR (160 MHz, CDCl<sub>3</sub>, 22 °C): δ -3.8 ppm (br, B); <sup>1</sup>H NMR (400 MHz, CDCl<sub>3</sub>, 22 °C): δ 8.03 (d, J = 6.3 Hz, 2H Ar<sub>(mp)</sub>), 7.46 (d, J = 8.6 Hz, 2H Ar<sub>(mp)</sub>), 7.42 – 7.20 (m, 15H Ph), 7.09 (s, 2H, Ar<sub>(mp)</sub>), 6.67 (s, 2H Ar<sub>(mp)</sub>), 2.80 (d, J<sub>H-H</sub> = 13.1 Hz, 2H, B-H<sub>t</sub>), -12.27 ppm (m, 2H, Ru-H-B); <sup>13</sup>C{<sup>1</sup>H} NMR (125 MHz, CDCl<sub>3</sub>, 22 °C): δ 114.4-128.0 (Ar<sub>(mp)</sub>), 129.3-133.4 (Ph), 137.6-138.1 (C-S), 145.1 (C-N), 179.7 (C=S) ppm; <sup>31</sup>P{<sup>1</sup>H} NMR (202 MHz, CDCl<sub>3</sub>, 22 °C): δ 60.8 ppm; IR (CH<sub>2</sub>Cl<sub>2</sub>):  $\tilde{\nu}$  = 2443 (B-H<sub>t</sub>), 1961 cm<sup>-1</sup> (B-H<sub>b</sub>).

**Syntheses of *trans-4* and *cis-4***: In the glovebox, mesitylborane (11 mg, 87 μmol) was added to a solution of [(κ<sup>2</sup>-N,S-(C<sub>7</sub>H<sub>4</sub>NS<sub>2</sub>)<sub>2</sub>PPH<sub>3</sub>Ru{κ<sup>1</sup>-S-(C<sub>7</sub>H<sub>4</sub>NS<sub>2</sub>)})], **2b** (30 mg, 34 μmol) in dry toluene (5mL). The reaction mixture was allowed to stir at 90 °C temperature for 12 h. The volatile components were removed under vacuum and red colour was washed with 4 × 5 mL of hexane to give inseparable yellow solid mixture of *trans* and *cis* isomers of compound **4** (16 mg, 45%). We report the combined spectroscopic data for *trans-4* and *cis-4*.

Combined spectroscopic data for *trans-4* and *cis-4*: MS (ESI<sup>+</sup>): *m/z* calculated for [C<sub>32</sub>H<sub>34</sub>B<sub>2</sub>N<sub>2</sub>RuS<sub>4</sub>]<sup>+</sup>: 698.0849, found 698.0799; <sup>11</sup>B{<sup>1</sup>H} NMR (160 MHz, Toluene-*d*<sub>8</sub>, 22 °C): δ 39.4 ppm (br, B) for *trans-4* and 31.2 ppm (br, B) for *cis-4*; <sup>1</sup>H{<sup>11</sup>B} NMR (500 MHz, Benzene-*d*<sub>6</sub>, 22 °C): δ -11.42 (br, 4H, Ru-H-B) for *trans-4* and -10.41 (br, 2H, Ru-H-B), -10.01 (br, 2H, Ru-H-B) for *cis-4*, 2.47 (s, 6H, CH<sub>3</sub>(Mes)), 2.31 (s, 3H, CH<sub>3</sub>(Mes)) mesityl proton for *trans-4* and 2.35 (s, 3H, CH<sub>3</sub>(Mes)), 2.31 (s, 3H, CH<sub>3</sub>(Mes)), 2.27 (s, 3H, CH<sub>3</sub>(Mes)) mesityl proton for *cis-4*, [7.69-6.53 ppm (all the mesityl and mercaptobenzothaizolyl aromatic proton) for *trans-4* and *cis-4*]; <sup>13</sup>C{<sup>1</sup>H} NMR (125 MHz, Toluene-*d*<sub>8</sub>, 22 °C): δ 22.7 (CH<sub>3</sub><sup>ortho</sup>, Mes), 20.4 (CH<sub>3</sub><sup>para</sup>, Mes) for *trans-4* and 22.5 (CH<sub>3</sub><sup>ortho</sup>, Mes), 22.3 (CH<sub>3</sub><sup>ortho</sup>, Mes), 20.2 (CH<sub>3</sub><sup>para</sup>, Mes) for *cis-4*, [140.8-114.7 ppm (all the mesityl and mercaptobenzothaizolyl aromatic carbon for *trans-4* and *cis-4*] 143.4-144.3 (C-N), 193.6-195.8 (C=S) *trans-4* and *cis-4*; IR (CH<sub>2</sub>Cl<sub>2</sub>):  $\tilde{\nu}$  = 1945 cm<sup>-1</sup> (B-H<sub>b</sub>) for *trans-4* and 1941 cm<sup>-1</sup> (B-H<sub>b</sub>) for *cis-4*.

## I.2 Spectroscopic Details

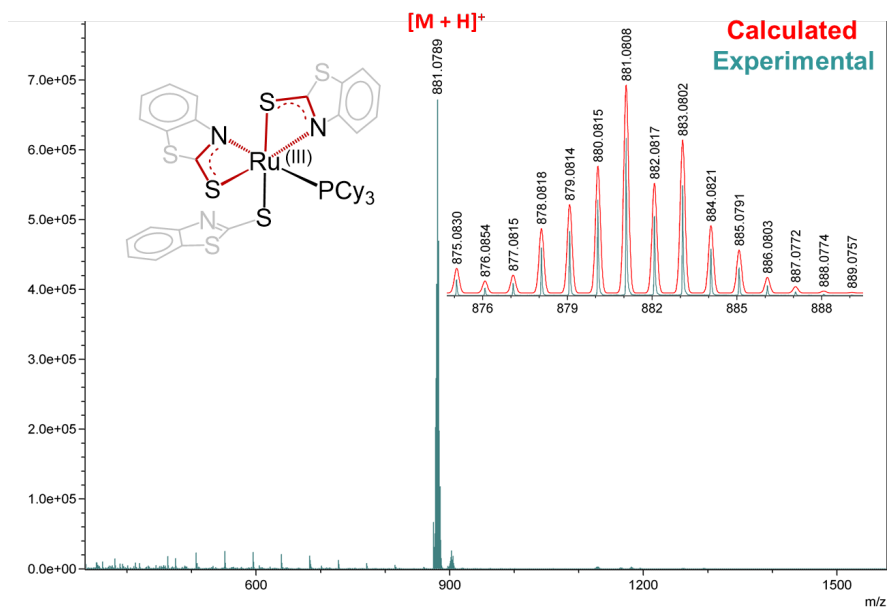

Figure S1. Calculated (red) and experimental (green) mass spectral isotopic distribution for the fragment of *mer-2a*.

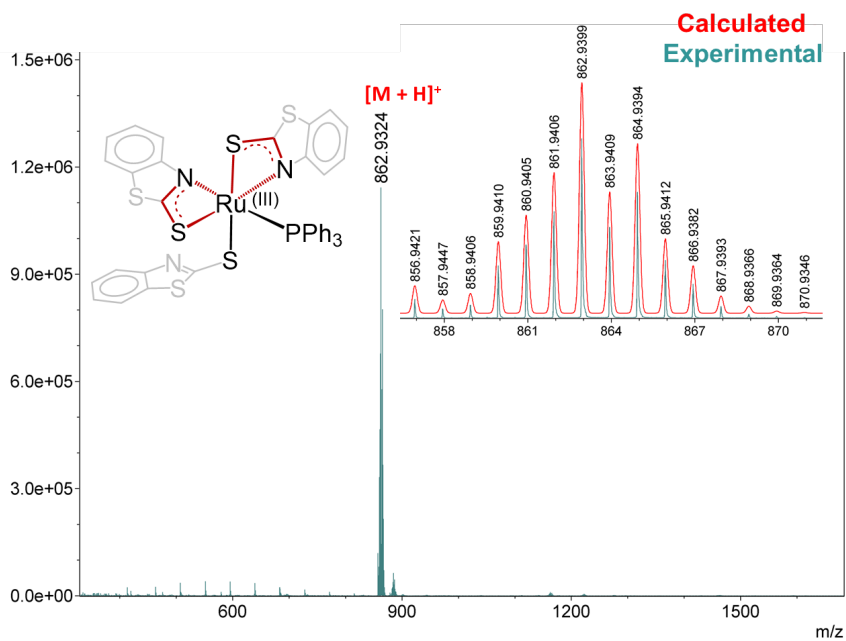

Figure S2. Calculated (red) and experimental (green) mass spectral isotopic distribution for the fragment of *mer-2b*.

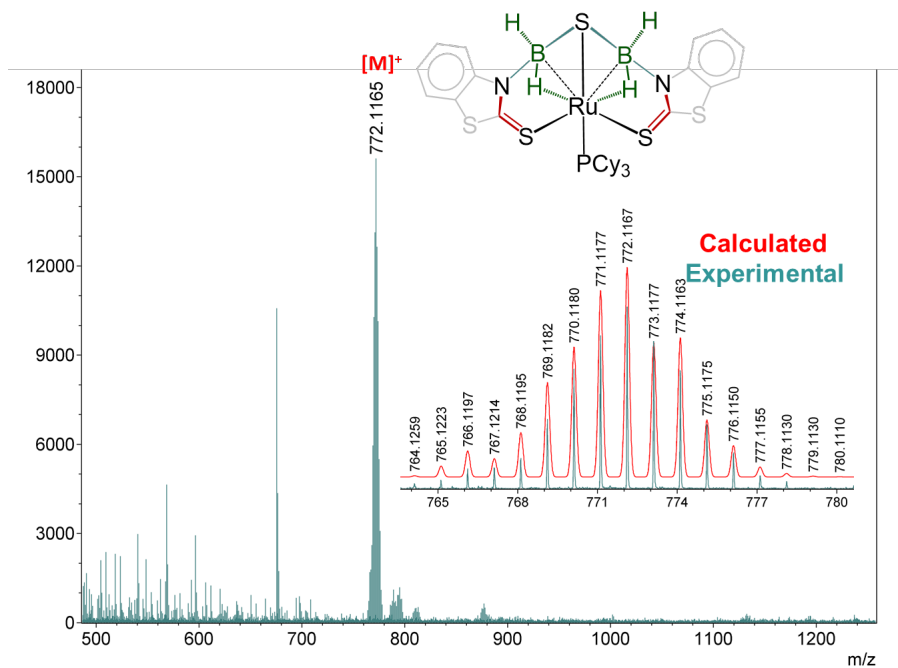

Figure S3. Calculated (red) and experimental (green) mass spectral isotopic distribution for the fragment of *fac-3a*.

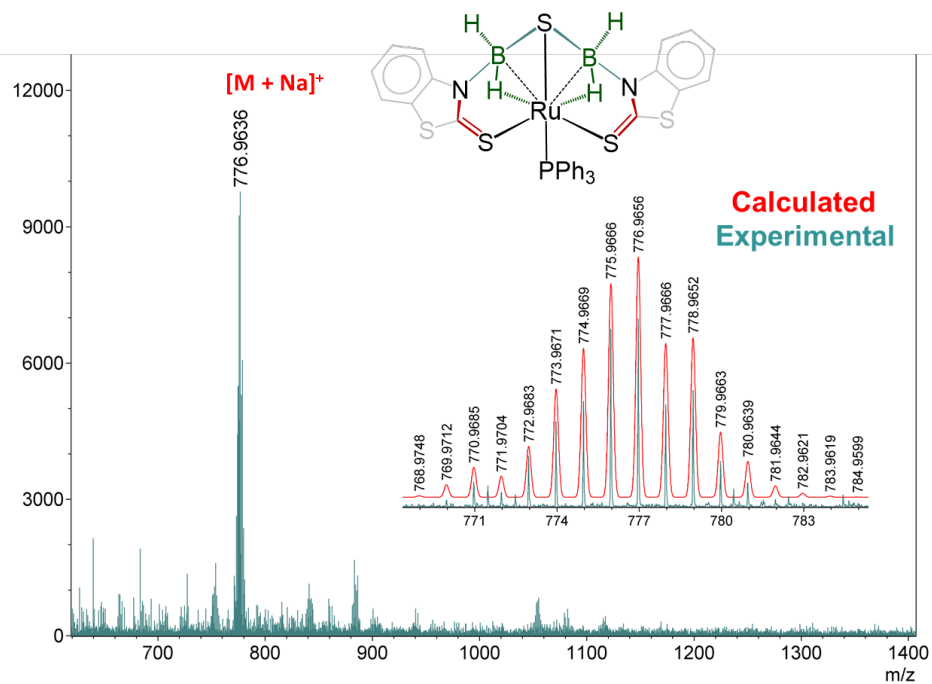

Figure S4. Calculated (red) and experimental (green) mass spectral isotopic distribution for the fragment of *fac-3b*.

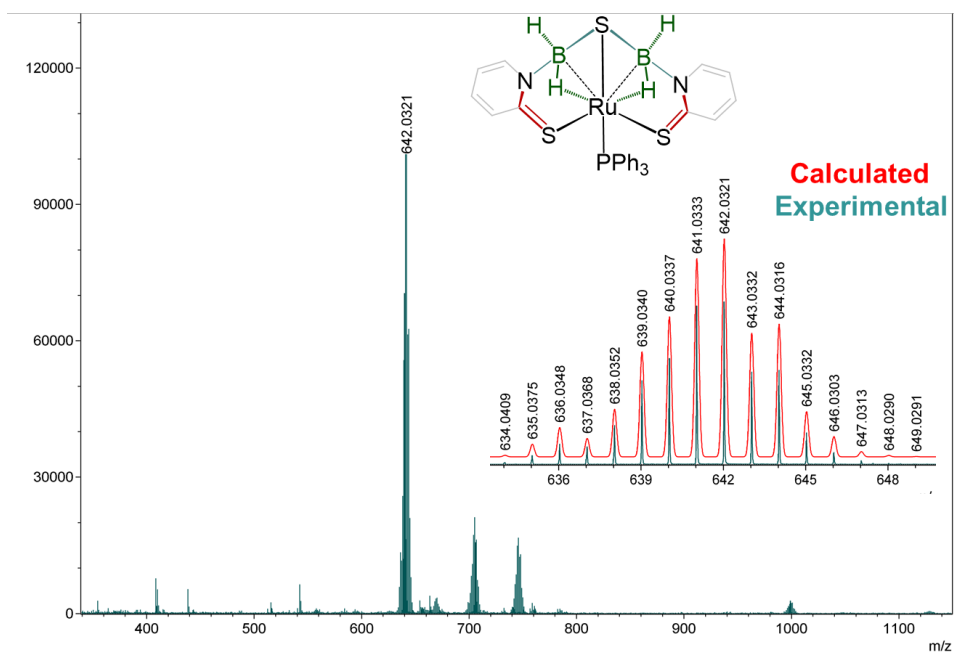

Figure S5. Calculated (red) and experimental (green) mass spectral isotopic distribution for the fragment of *fac*-3c.

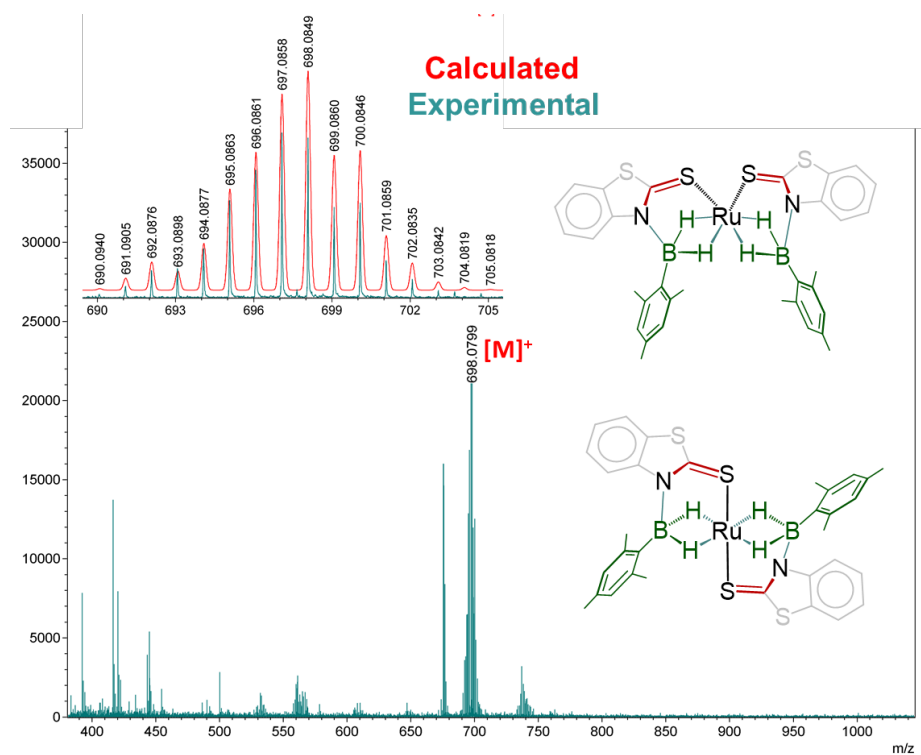

Figure S6. Combined calculated (red) and experimental (green) mass spectral isotopic distribution for the fragment of *trans*-4 and *cis*-4.



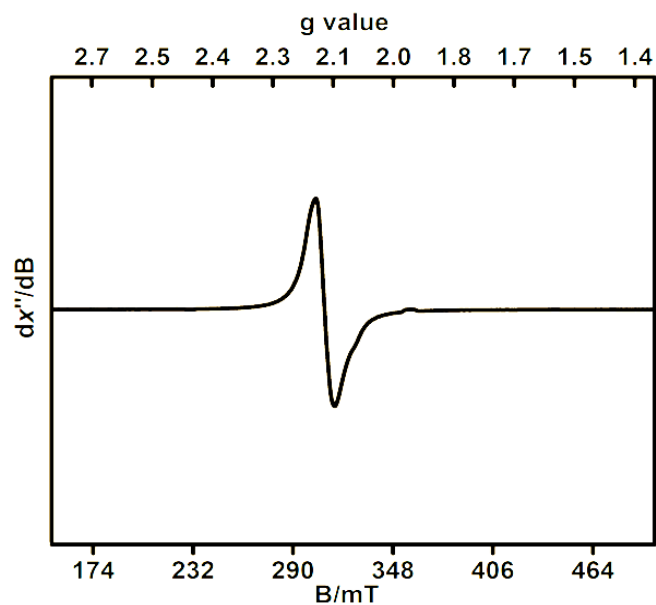

Figure S7. EPR spectrum of *mer-2b*.

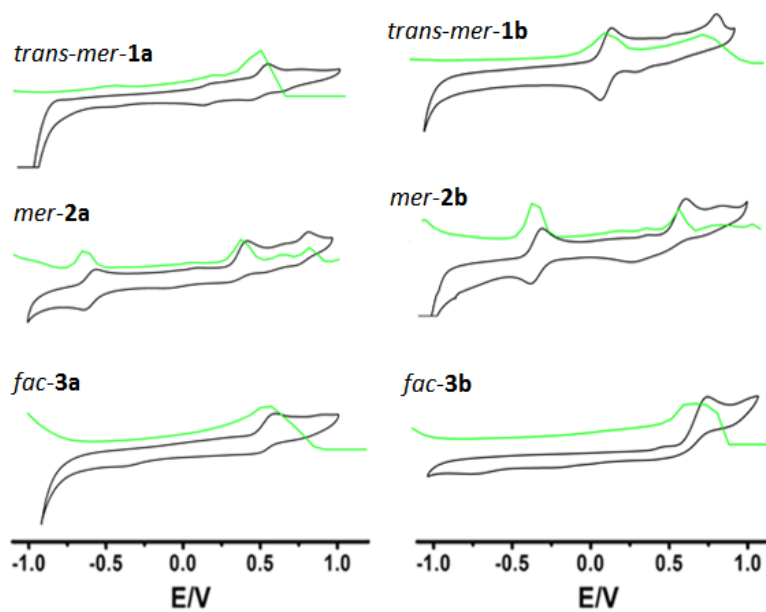

Figure S8. Cyclic voltammetry of *trans-mer-1a*, *mer-2a* and *fac-3a* (left), *trans-mer-1b*, *mer-2b* and *fac-3b* (right) collected at 100 mV/s as well as their differential pulse voltammetry (green). All CV data were collected in  $\text{CH}_3\text{CN}$  with 0.1 M  $(\text{nBu}_4\text{N})\text{PF}_6$  using a glassy carbon working electrode, Pt wire counter electrode, and Ag/AgCl-reference electrode.

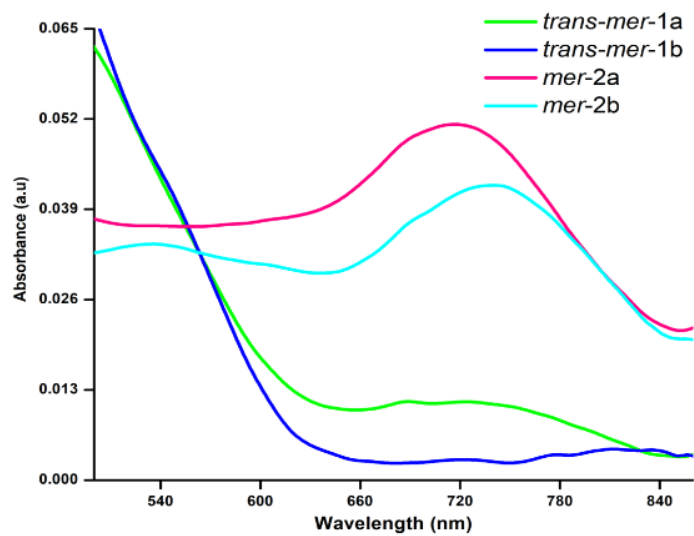

Figure S9. Comparison of UV-Vis/NIR spectra of *mer-2a-b* and *trans-mer-1a-b* in dichloromethane.

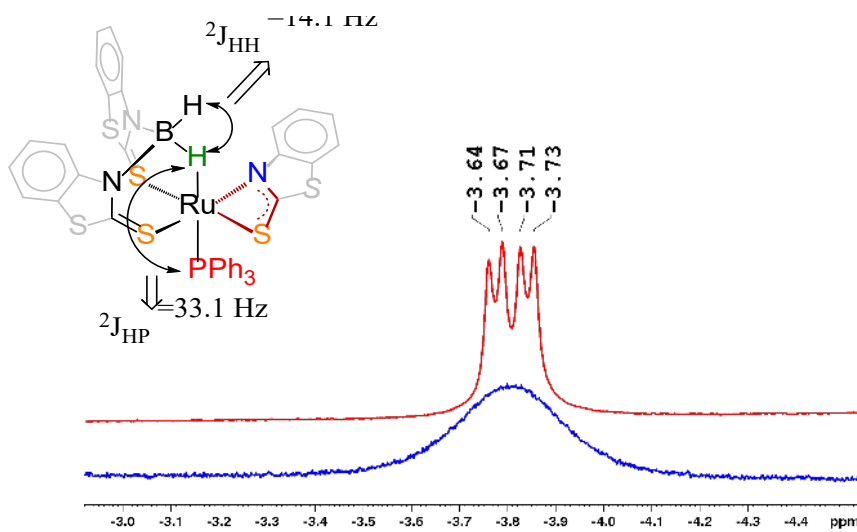

Figure S10. Combined  $^1\text{H}$  NMR and  $^1\text{H}\{^{11}\text{B}\}$  NMR spectra of complex *trans-mer-1b* in  $\text{CDCl}_3$  (500 MHz).

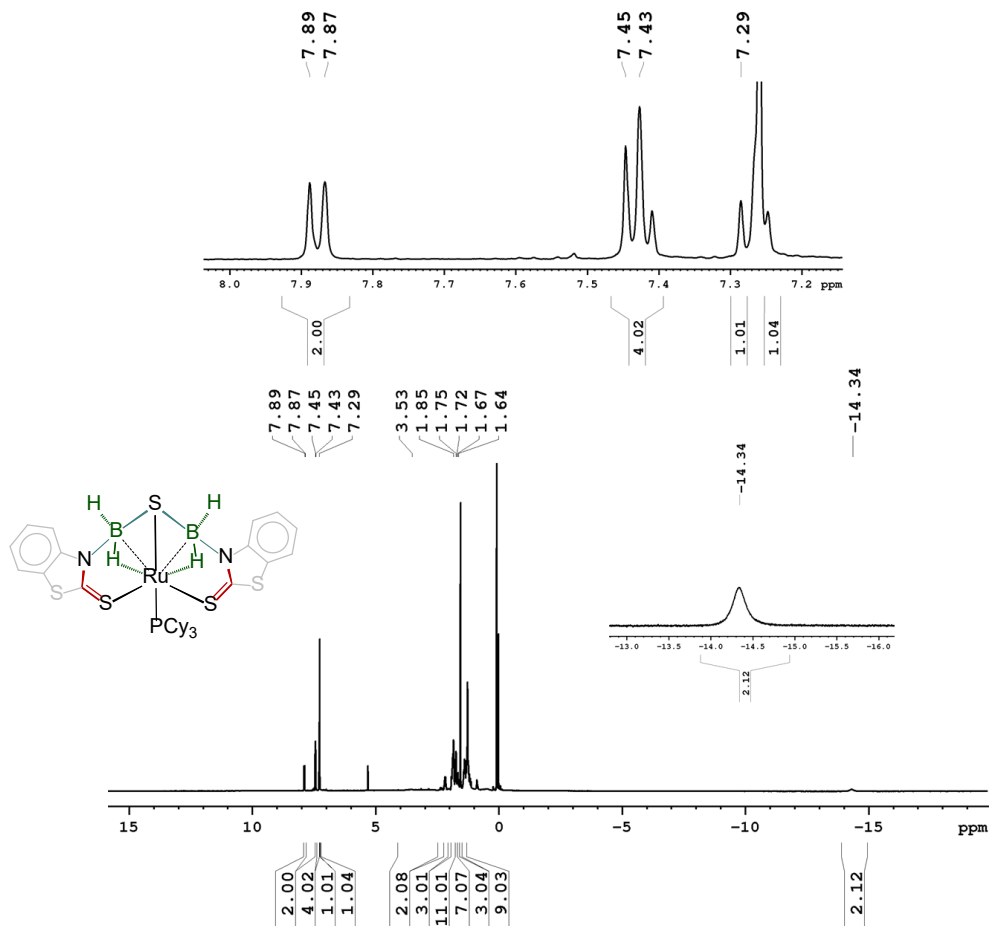

Figure S11.  $^1\text{H}$  NMR spectrum of the complex *fac*-3a in  $\text{CDCl}_3$  (500 MHz).

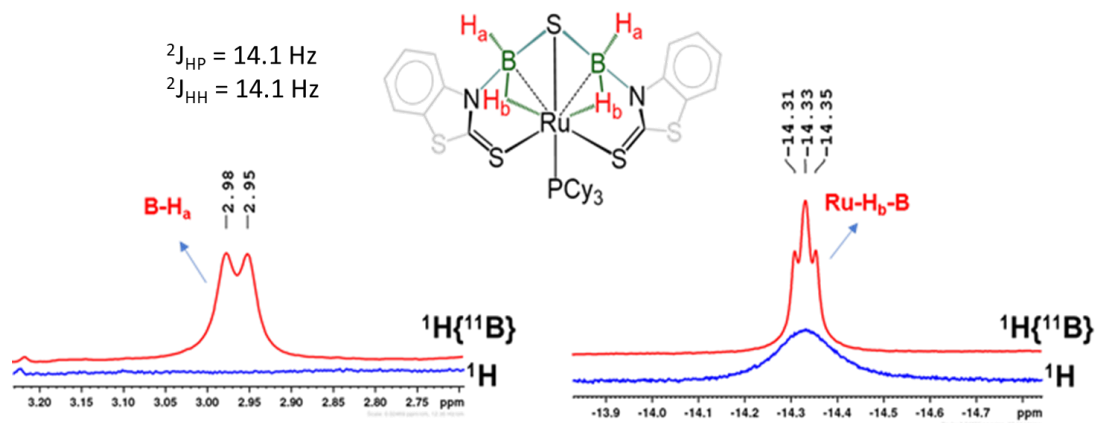

Figure S12. Combined  $^1\text{H}$  NMR and  $^1\text{H}\{^{11}\text{B}\}$  NMR spectra of complex *fac*-3a in  $\text{CDCl}_3$  (500 MHz).

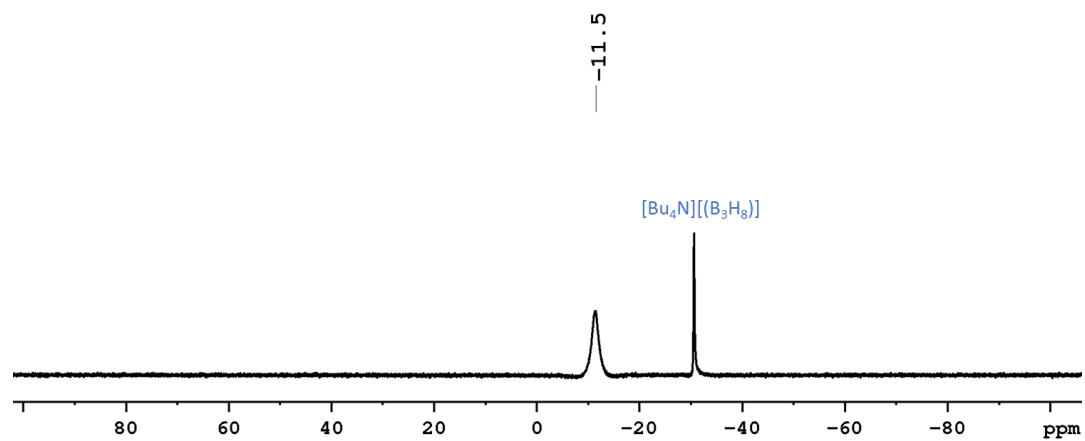

Figure S13.  $^{11}\text{B}\{^1\text{H}\}$  NMR spectrum of the complex *fac-3a* in  $\text{CDCl}_3$  (160 MHz).

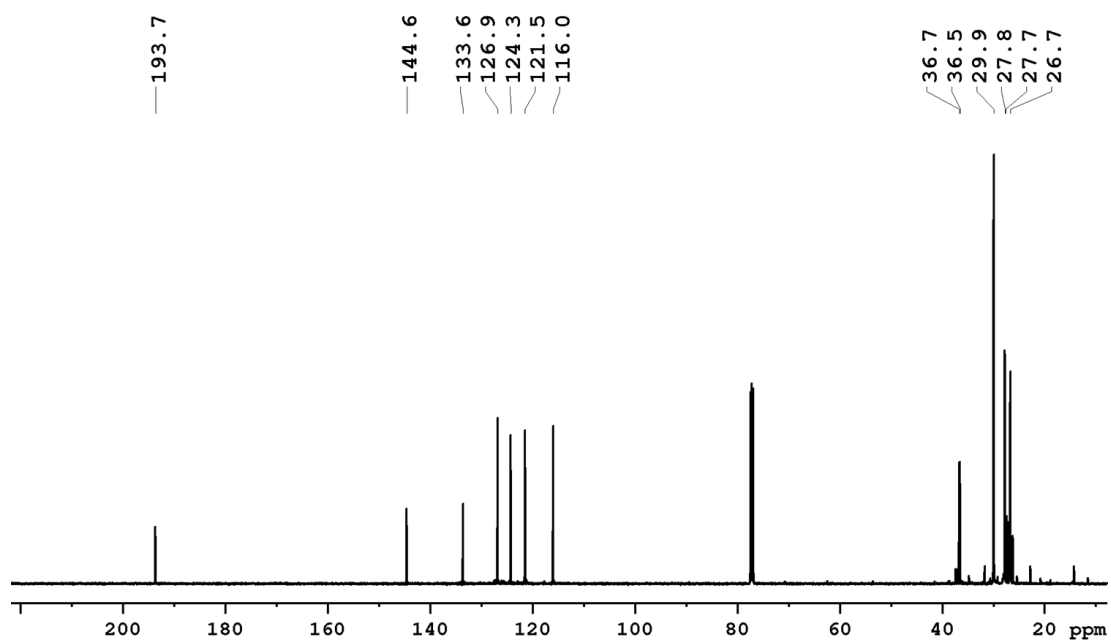

Figure S14.  $^{13}\text{C}\{^1\text{H}\}$  NMR spectrum of the complex *fac-3a* in  $\text{CDCl}_3$  (125 MHz). (≠.solvent and grease impurities).

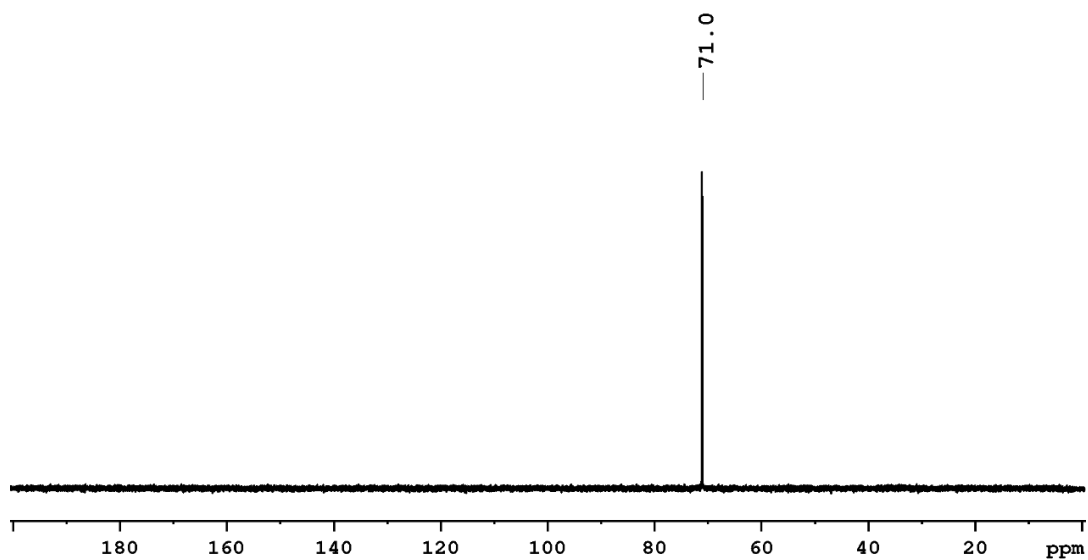

Figure S15. <sup>31</sup>P{<sup>1</sup>H} NMR spectrum of the complex *fac-3a* in CDCl<sub>3</sub> (202 MHz).

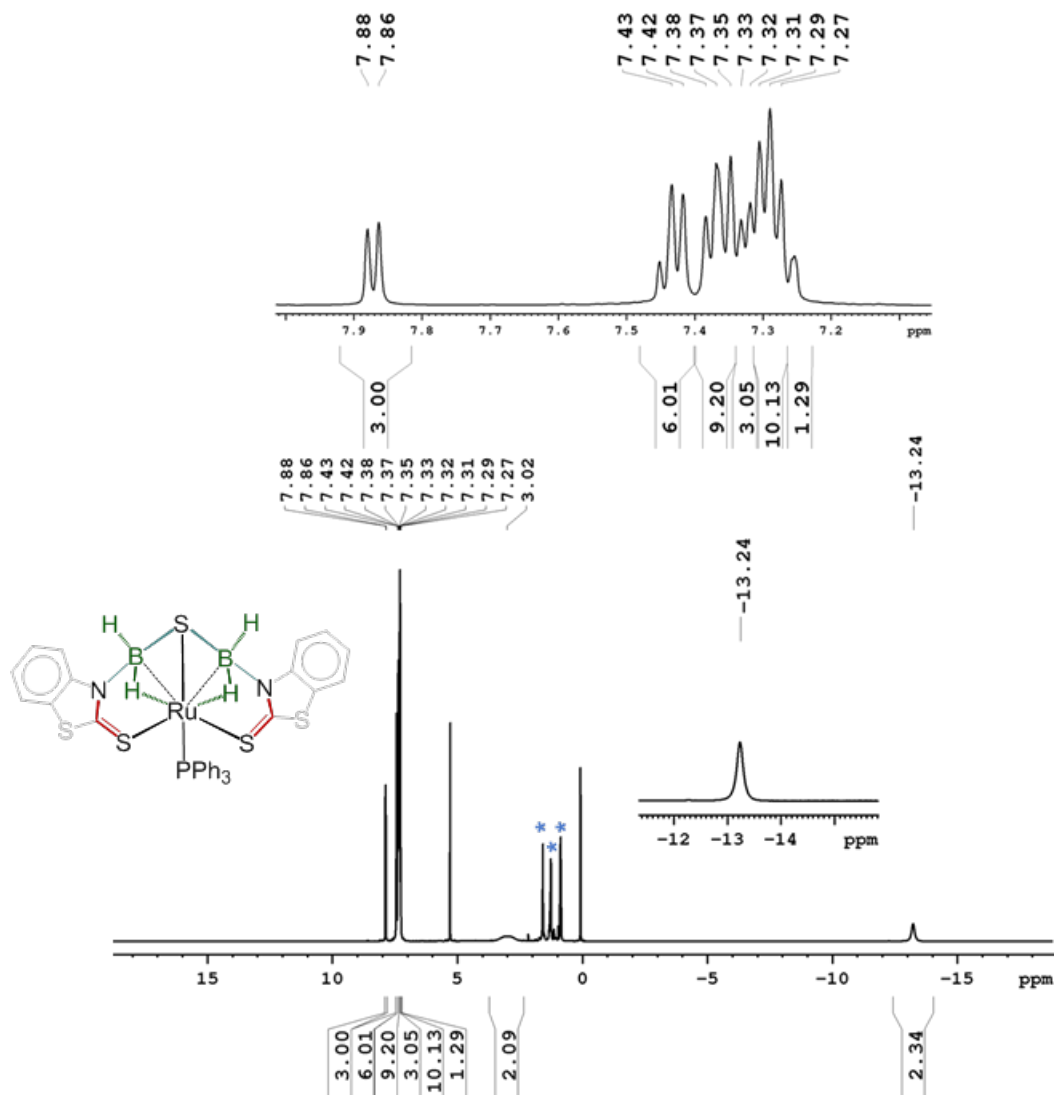

Figure S16. <sup>1</sup>H NMR spectrum of the complex *fac-3b* in CDCl<sub>3</sub> (500 MHz) (–= solvent and grease impurities).

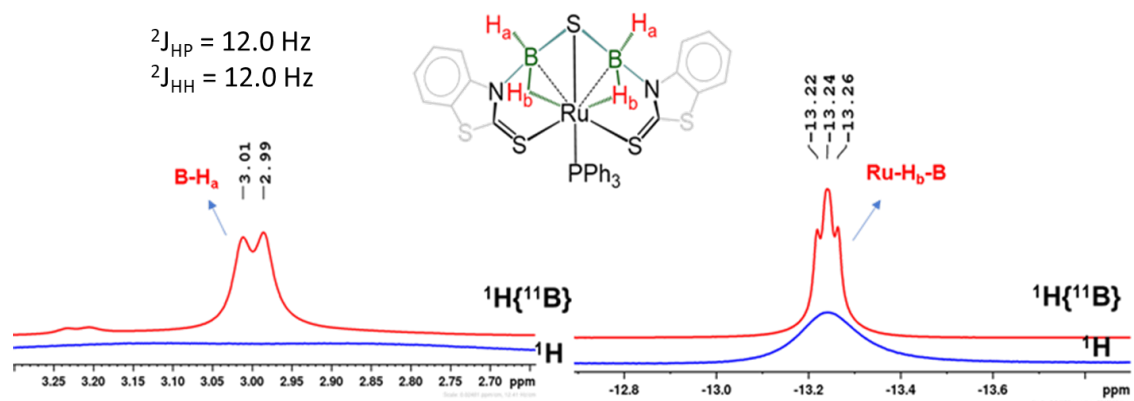

Figure S17. Combined  ${}^1\text{H}$  NMR and  ${}^1\text{H}\{{}^{11}\text{B}\}$  NMR spectra of complex *fac-3b* in  $\text{CDCl}_3$  (500 MHz).

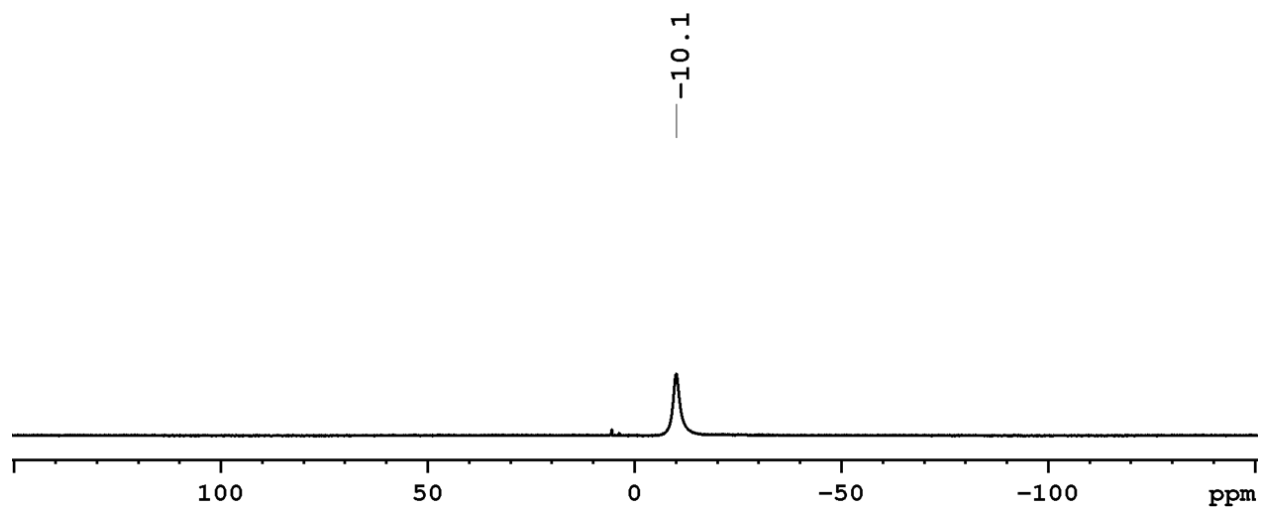

Figure S18.  ${}^{11}\text{B}\{{}^1\text{H}\}$  NMR spectrum of the complex *fac-3b* in  $\text{CDCl}_3$  (160 MHz).

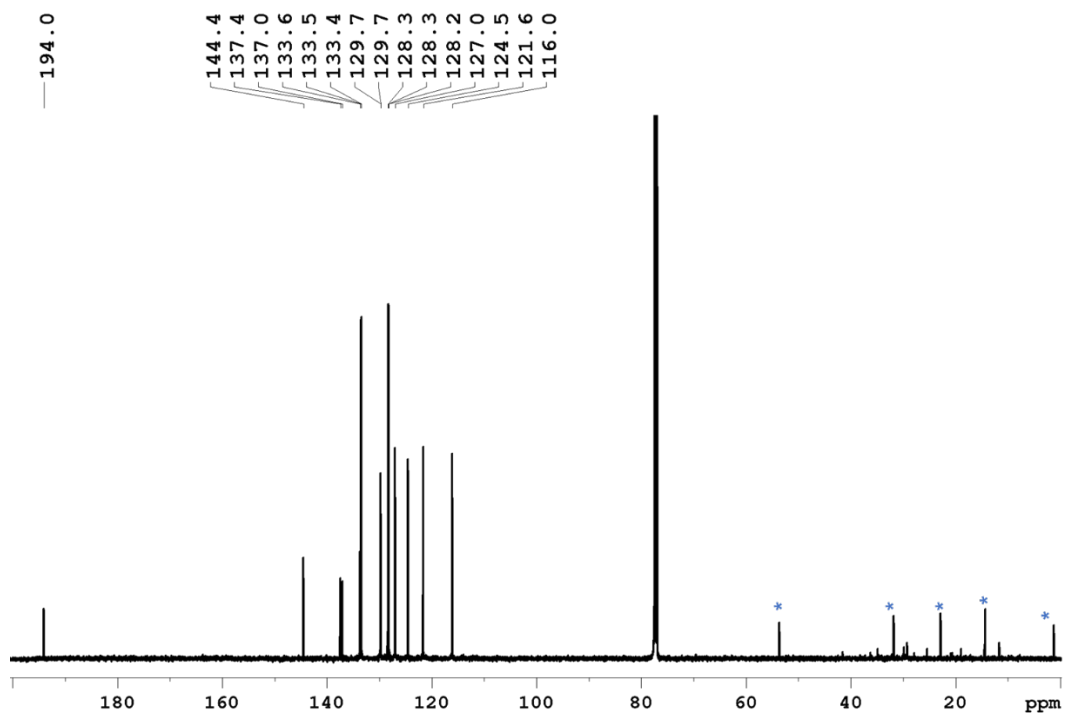

Figure S19.  $^{13}\text{C}\{^1\text{H}\}$  NMR spectrum of the complex *fac-3b* in  $\text{CDCl}_3$  (125 MHz). (= solvent and grease impurities).

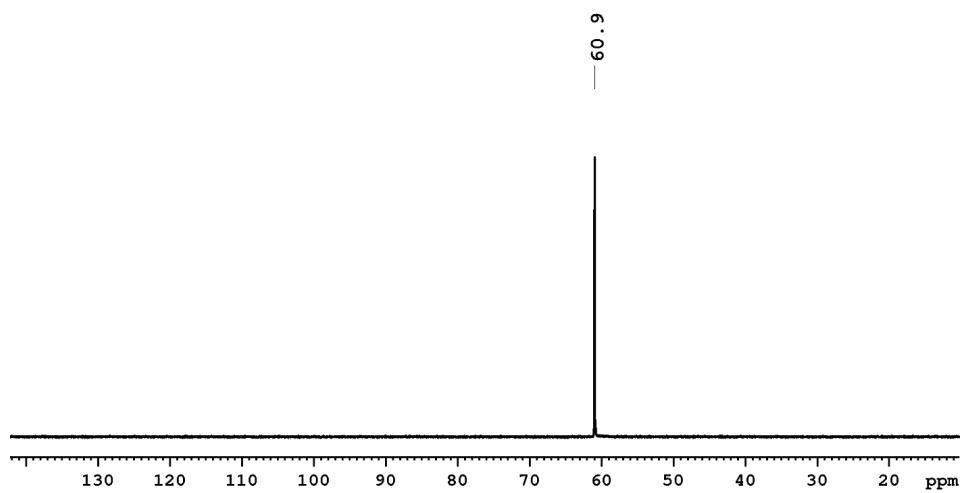

Figure S20.  $^{31}\text{P}\{^1\text{H}\}$  NMR spectrum of the complex *fac-3b* in  $\text{CDCl}_3$  (202 MHz).

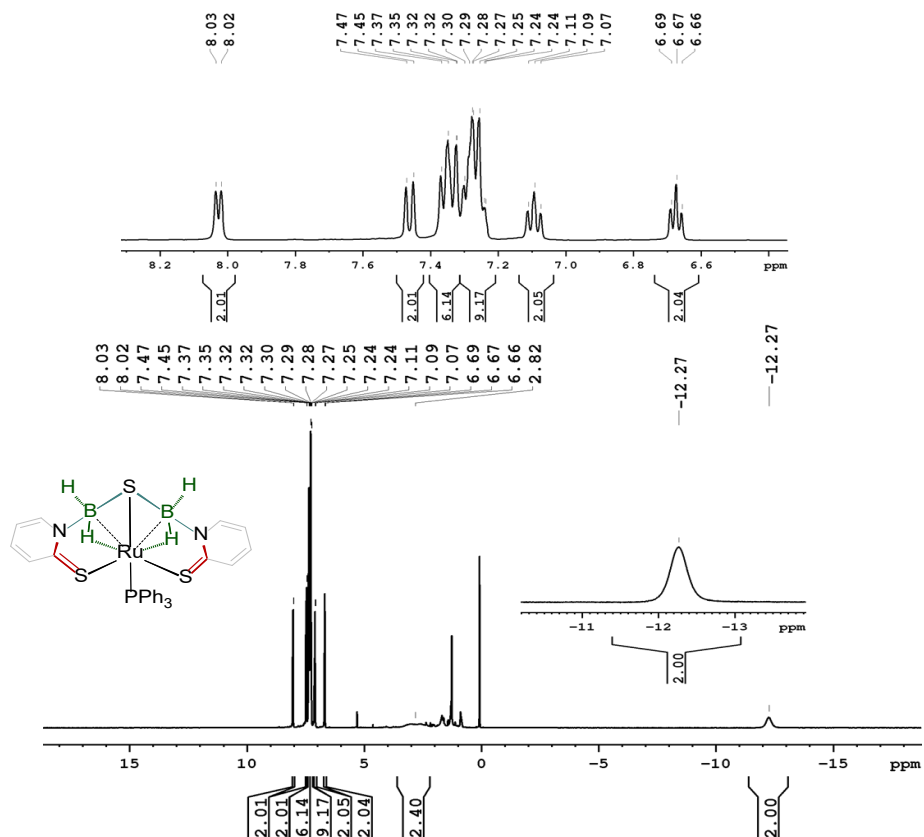

Figure S21.  $^1\text{H}$  NMR spectrum of the complex *fac*-3c in  $\text{CDCl}_3$  (400 MHz).

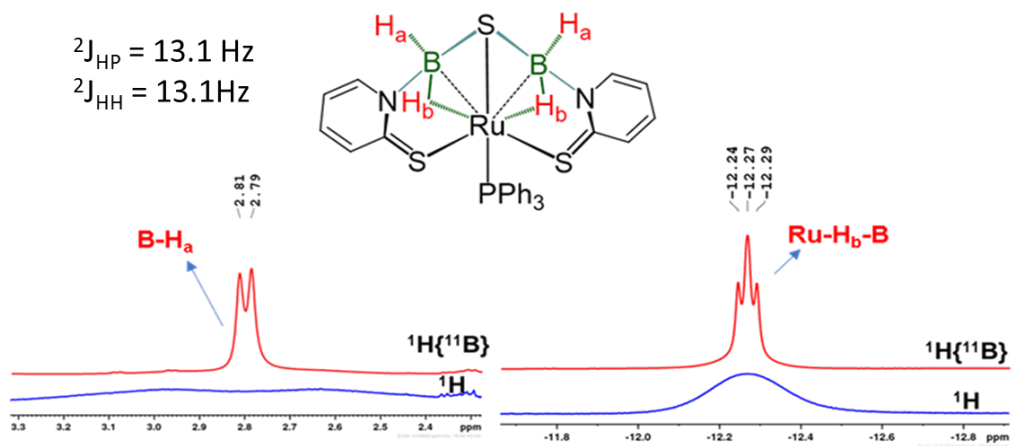

Figure S22. Combined  $^1\text{H}$  NMR and  $^1\text{H}\{^{11}\text{B}\}$  NMR spectra of complex *fac*-3c in  $\text{CDCl}_3$  (500 MHz).



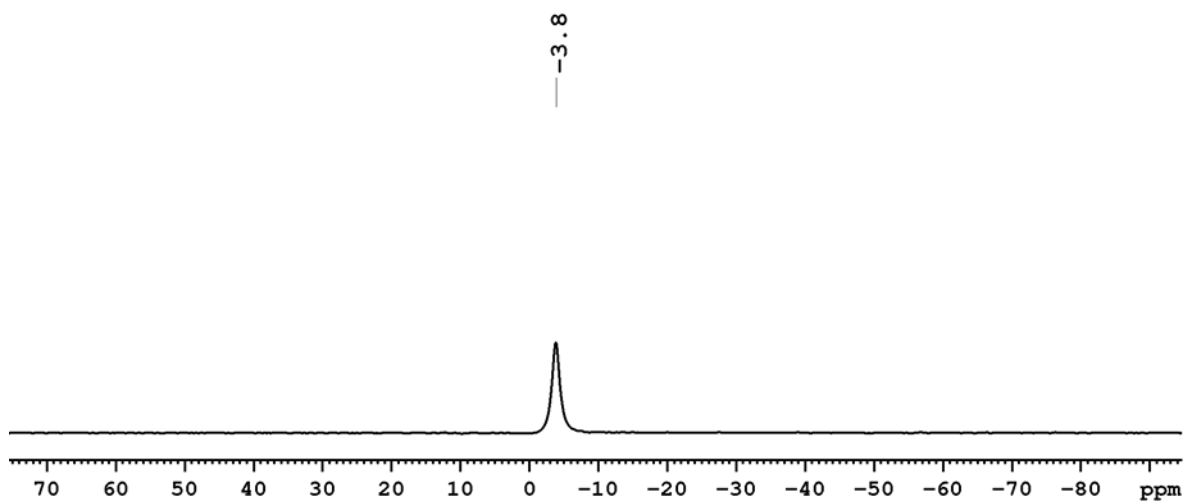

Figure S23.  $^{11}\text{B}\{^1\text{H}\}$  NMR spectrum of the complex *fac-3c* in  $\text{CDCl}_3$  (160 MHz).

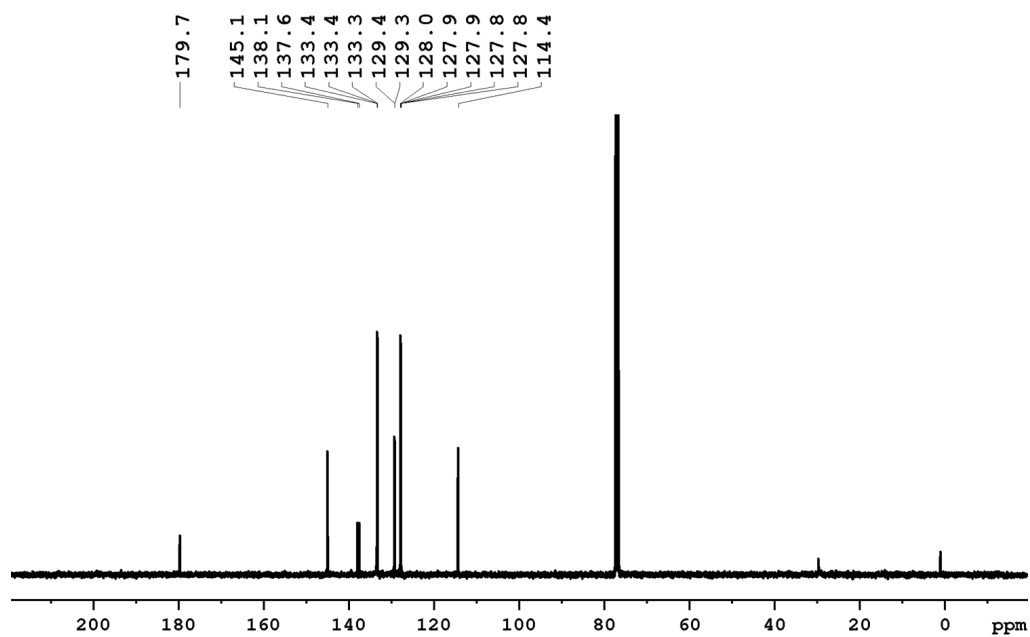

Figure S24.  $^{13}\text{C}\{^1\text{H}\}$  NMR spectrum of the complex *fac-3c* in  $\text{CDCl}_3$  (125 MHz). (\*=, solvent and grease impurities).

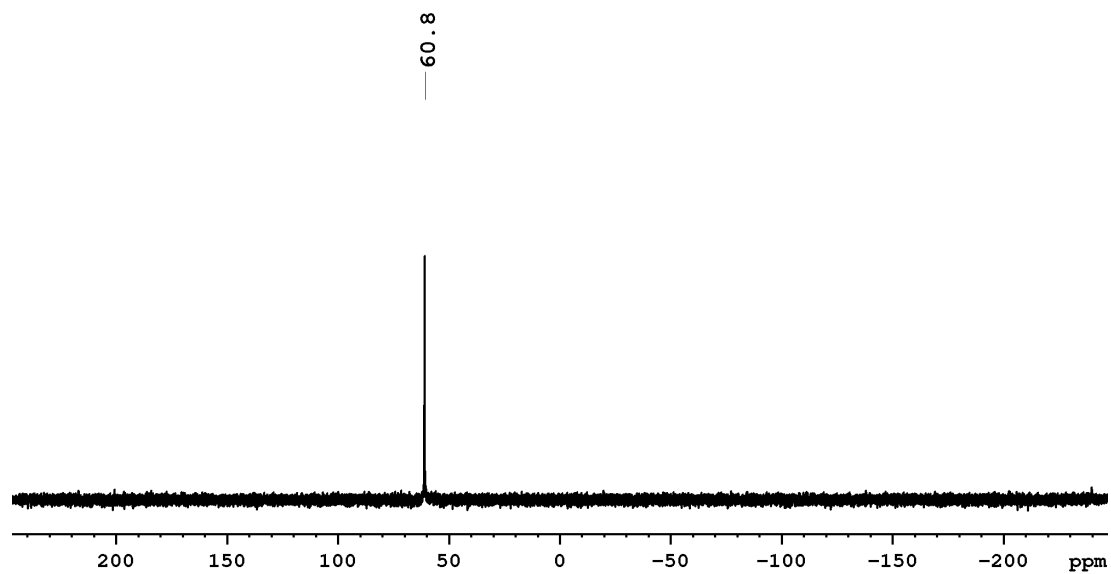

Figure S25.  $^{31}\text{P}\{^1\text{H}\}$  NMR spectrum of the complex *fac*-3c in  $\text{CDCl}_3$  (202 MHz).

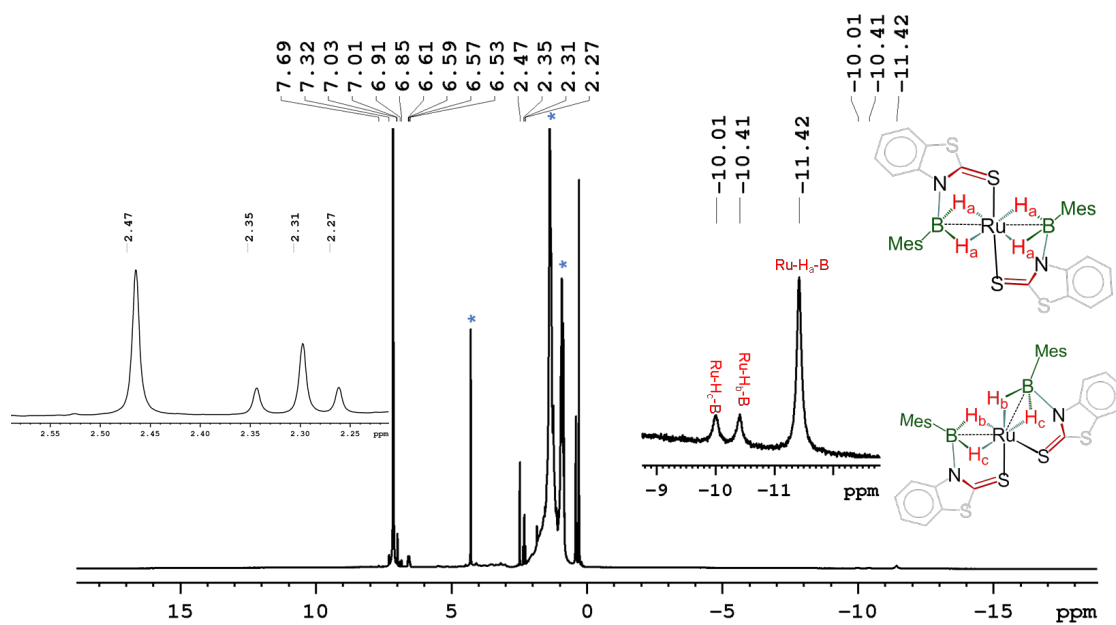

Figure S26. Combined  $^1\text{H}$  NMR spectrum of the complex *trans*-4 and *cis*-4 in Benzene- $d_6$  (500 MHz) (= solvent and grease impurities).

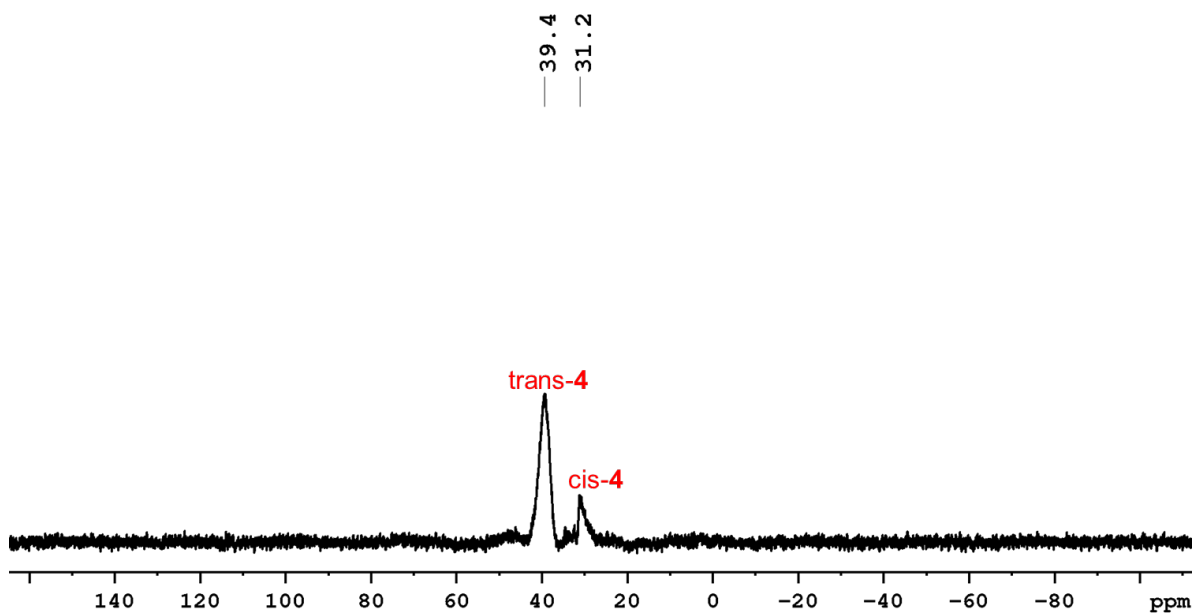

Figure S27. Combined  $^{11}\text{B}\{^1\text{H}\}$  NMR spectrum of the complex *trans-4* and *cis-4* in Toluene- $d_8$  (160 MHz).

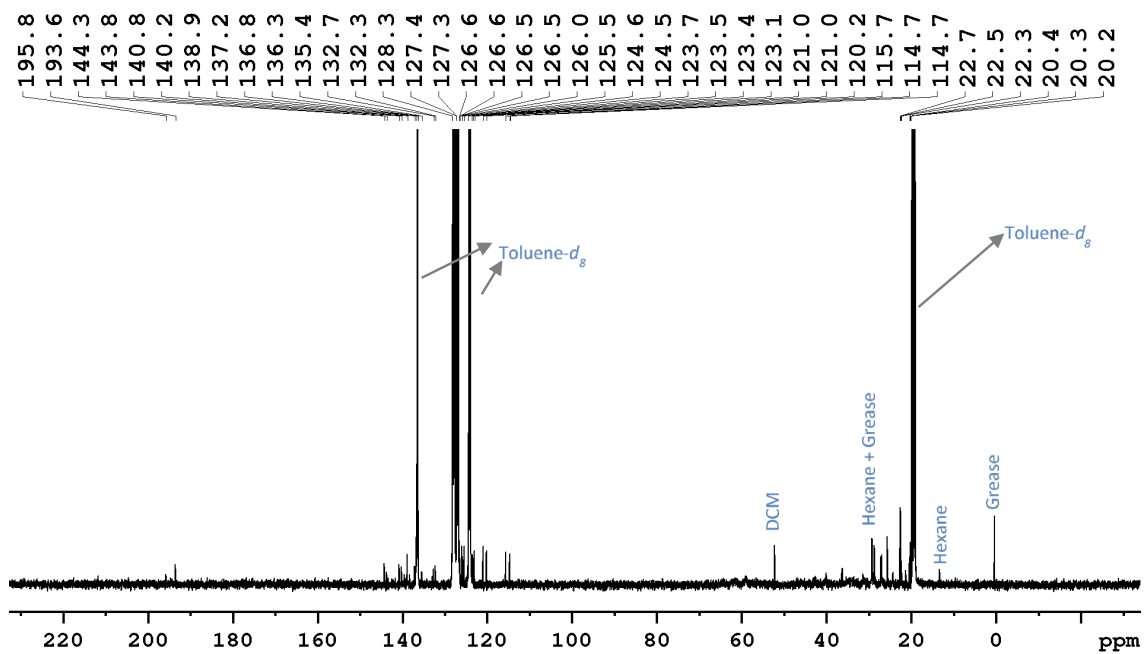

Figure S28. Combined  $^{13}\text{C}\{^1\text{H}\}$  NMR spectrum of *trans-4* and *cis-4* in Toluene- $d_8$  (125 MHz).

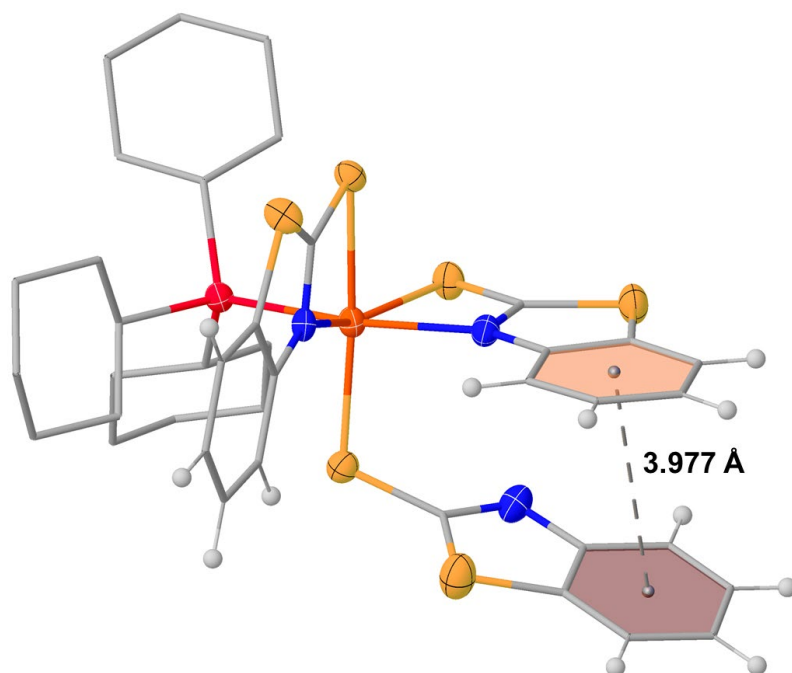

Figure S29.  $\pi$ - $\pi$  stacking of mercatobenzothiazoyl rings in *mer-2a*.

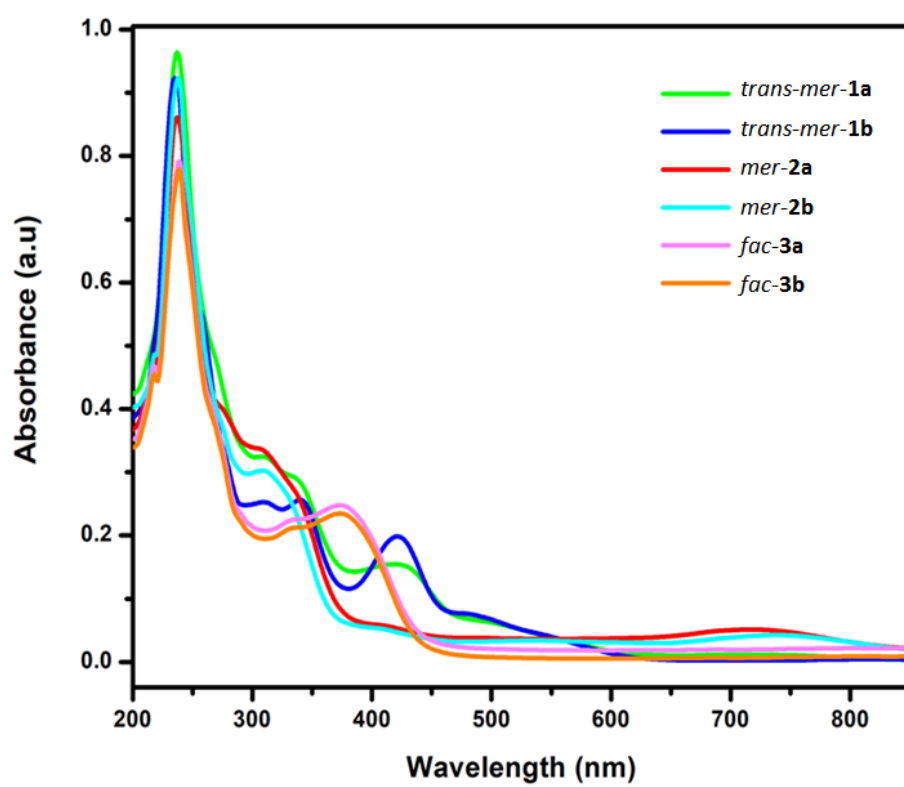

Figure S30. UV-Vis absorption spectra of *trans-mer-1a-b*, *mer-2a-b* and *fac-3a-b* in dichloromethane.

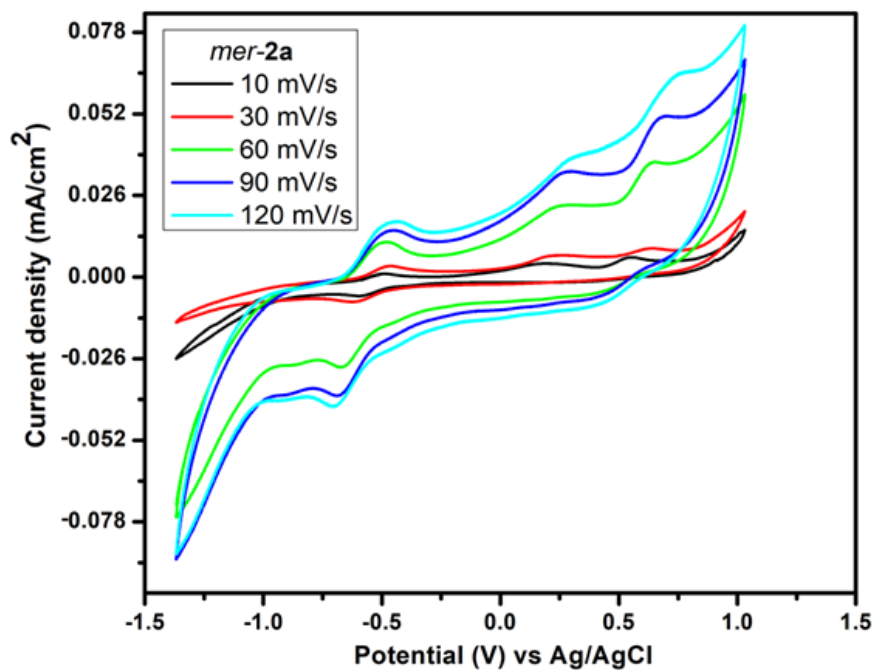

Figure S31. Cyclic voltammetry (CV) curves of complex *mer-2a* at different scan rates.

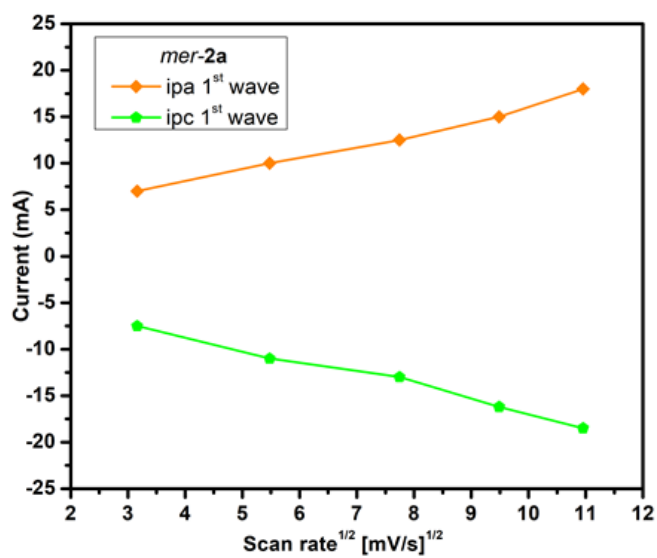

Figure S32 Plot of cathodic and anodic peak current vs square root of scan rate for the first redox reversible wave couple of complex *mer-2a*.

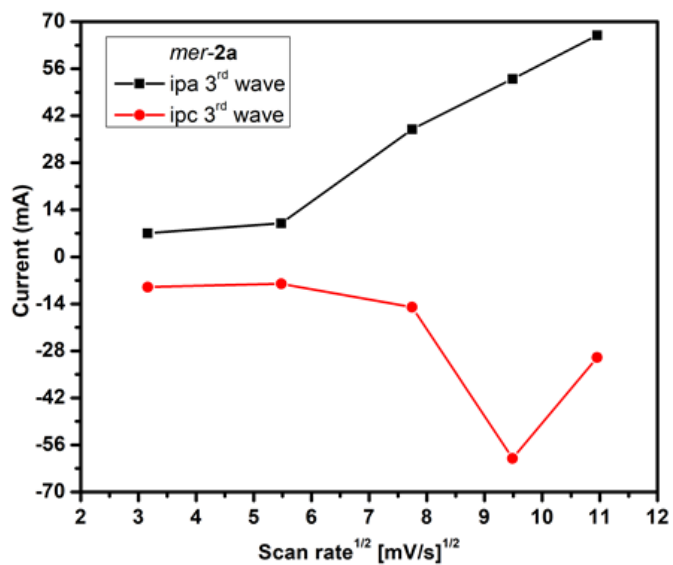

Figure S33. Plot of cathodic and anodic peak current vs square root of scan rate for the third quasi-reversible wave couple of complex *mer-2a*.

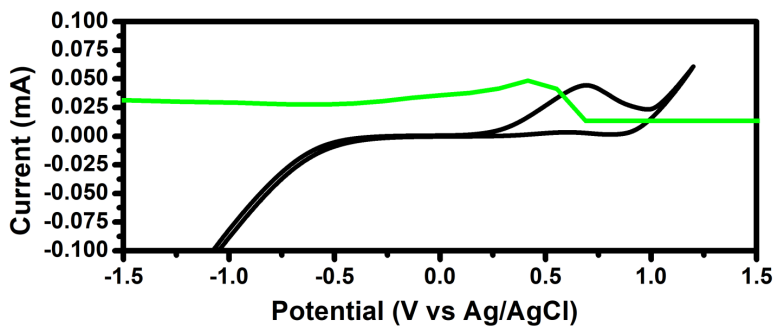

Figure S34. CV of 2-mercaptobenzothiazole.

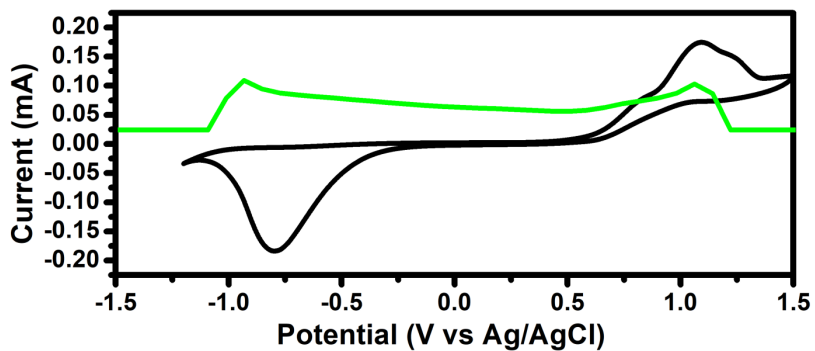

Figure S35. CV of dihydrobis(2-mercaptobenzothiazolyl) borate.

### I.3 X-ray analysis details

Suitable X-ray quality crystals of *mer-2a*, *fac-3a* and *trans-4* were grown by slow diffusion of a hexane-CH<sub>2</sub>Cl<sub>2</sub> solution at -5 °C. Crystal data of *mer-2a* and *fac-3a* were obtained using a Bruker AXS Kappa APEXII CCD diffractometer with graphite monochromated Mo-K $\alpha$  ( $\lambda$  = 0.71073 Å) radiation at 296 K and 150 K respectively. The crystal data of *trans-4* was collected and integrated using a CMOS D<sub>8</sub> VENTURE Bruker-AXS diffractometer with graphite monochromated Mo-K $\alpha$  ( $\lambda$  = 0.71073 Å) radiation at 297 K. All the structures were solved using SIR97<sup>5</sup> and refined with SHELXL-2018, SHELXL-2014, and SHELXL-2017<sup>6</sup> Using Olex2<sup>7</sup> all the molecular structures were drawn. The non-hydrogen atoms were refined with anisotropic displacement parameters. All hydrogens could be located in the difference Fourier map. However, the hydrogen atoms bonded to carbons and borons were fixed at chemically meaningful positions and were allowed to ride with the parent atom during the refinement. Crystallographic data have been deposited with the Cambridge Crystallographic Data Center as supplementary publication no CCDC-1875697 (*mer-2a*), CCDC-1984218 (*fac-3a*), CCDC-2126931 (*fac-3c*), CCDC-2040802 (*trans-4*). These data can be obtained free of charge from The Cambridge Crystallographic Data Centre via [www.ccdc.cam.ac.uk/data\\_request/cif](http://www.ccdc.cam.ac.uk/data_request/cif).

*Crystal data for mer-2a*: C<sub>39</sub>H<sub>44</sub>N<sub>3</sub>PRuS<sub>6</sub>, M<sub>r</sub> = 963.16, monoclinic, space group *C1 2/c1*, a = 43.162(6) Å, b = 11.6075(14) Å, c = 17.077(2) Å,  $\alpha$  = 90°,  $\beta$  = 94.107(5)°,  $\gamma$  = 90°, V = 8533.5(19) Å<sup>3</sup>, Z = 8,  $\rho_{\text{calcd}}$  = 1.4993 g/cm<sup>3</sup>,  $\mu$  = 0.857 mm<sup>-1</sup>, F(000) = 3960.0, R<sub>1</sub> = 0.0685, wR<sub>2</sub> = 0.1845, 7512 independent reflections [2 $\theta$  ≤ 50.000°] and 478 parameters.

*Crystal data for fac-3a*: C<sub>32</sub>H<sub>45</sub>B<sub>2</sub>N<sub>2</sub>PRuS<sub>5</sub>, M<sub>r</sub> = 771.66, monoclinic, space group *P21/c*, a = 17.2497(13) Å, b = 15.0068(10) Å, c = 19.7663(14) Å,  $\alpha$  = 90°,  $\beta$  = 115.089(2)°,  $\gamma$  = 90°, V = 4634.0(6) Å<sup>3</sup>, Z = 4,  $\rho_{\text{calcd}}$  = 1.106 g/cm<sup>3</sup>,  $\mu$  = 0.618 mm<sup>-1</sup>, F(000) = 1600.0, R<sub>1</sub> = 0.0356, wR<sub>2</sub> = 0.0872, 10624 independent reflections [2 $\theta$  ≤ 50.486°] and 443 parameters.

*Crystal data for fac-3c*: C<sub>28</sub>H<sub>27</sub>B<sub>2</sub>N<sub>2</sub>PRuS<sub>3</sub>, M<sub>r</sub> = 642.03, monoclinic, space group *P21/n*, a = 9.9824(3) Å, b = 23.4742(9) Å, c = 13.6413(6) Å,  $\alpha$  = 90°,  $\beta$  = 94.6068(17)°,  $\gamma$  = 90°, V = 3186.2(2) Å<sup>3</sup>, Z = 4,  $\rho_{\text{calcd}}$  = 1.514 g/cm<sup>3</sup>,  $\mu$  = 0.930 mm<sup>-1</sup>, F(000) = 1472, R<sub>1</sub> = 0.0338, wR<sub>2</sub> = 0.0740, 5602 independent reflections [2 $\theta$  ≤ 50.000°] and 377 parameters.

*Crystal data for trans-4*: C<sub>32</sub>H<sub>36</sub>BCl<sub>2</sub>N<sub>2</sub>RuS<sub>4</sub>, M<sub>r</sub> = 782.47, triclinic, space group *P-1*, a = 8.1421(16) Å, b = 9.0380(16) Å, c = 11.991(2) Å,  $\alpha$  = 91.746(5)°,  $\beta$  = 95.358(6)°,  $\gamma$  = 91.618(5)°, V = 877.7(3) Å<sup>3</sup>, Z = 1,  $\rho_{\text{calcd}}$  = 1.480 g/cm<sup>3</sup>,  $\mu$  = 0.863 mm<sup>-1</sup>, F(000) = 400, R<sub>1</sub> = 0.0486, wR<sub>2</sub> = 0.1206, 3426 independent reflections [2 $\theta$  ≤ 50.48°] and 217 parameters.

## II Computational Details

**II.1 Computational details:** Density functional theory (DFT) calculations employing B3PW91<sup>8</sup> functional were performed with the Gaussian 09<sup>9</sup> program. Full geometry optimizations were conducted in gaseous state (no solvent effect) without any symmetry constraints using a LANL2DZ<sup>10</sup> basis set on ruthenium and phosphorous atoms and 6-31G(d,p)<sup>11</sup> basis set on remaining atoms (C, H, B, N, S). The optimized geometries were characterized as true minima by conducting frequency calculations. We have computed <sup>11</sup>B NMR chemical shifts using gauge-including atomic orbitals (GIAOs)<sup>12</sup> method at the same basis set by B3LYP. The <sup>11</sup>B NMR chemical shifts were calculated relative to B<sub>2</sub>H<sub>6</sub> and converted to the usual [BF<sub>3</sub>.OEt<sub>2</sub>] scale by using experimental  $\delta$  (<sup>11</sup>B) value of B<sub>2</sub>H<sub>6</sub> ( $\delta$  = 16.6 ppm).<sup>13</sup> Natural bonding analyses were carried out with the natural bond orbital (NBO) 6.0 version of program.<sup>14</sup> Wiberg bond indices (WBI)<sup>15</sup> were obtained from natural bond orbital analysis. The electron density and Laplacian electronic distribution plots were generated using Multiwfn package.<sup>16</sup> All the optimized structures and orbital plots were generated by using Chemcraft.<sup>17</sup>

## II.2 Computational data

**Table S1.** Selected geometrical parameters and Wiberg bond indices (WBI) of *mer-2a-b*, *fac-3a-b*, *trans-4* and *cis-4*.

| <i>mer-2a</i>  |            |       |       | <i>mer-2b</i> |       |       |       |
|----------------|------------|-------|-------|---------------|-------|-------|-------|
|                | Expt.      | Cal.  | WBI   |               | Expt. | Cal.  | WBI   |
| Ru1-P1         | 2.347(2)   | 2.494 | 0.516 | Ru1-P1        | -     | 2.449 | 0.498 |
| Ru1-S1         | 2.278(2)   | 2.301 | 0.771 | Ru1-S1        | -     | 2.295 | 0.784 |
| Ru1-S3         | 2.491(2)   | 2.535 | 0.402 | Ru1-S3        | -     | 2.540 | 0.402 |
| Ru1-S6         | 2.342(2)   | 2.406 | 0.634 | Ru1-S6        | -     | 2.401 | 0.631 |
| Ru1-N1         | 2.138(6)   | 2.167 | 0.314 | Ru1-N1        | -     | 2.160 | 0.320 |
| Ru1-N2         | 2.164(6)   | 2.123 | 0.340 | Ru1-N2        | -     | 2.112 | 0.349 |
| C1-S1          | 1.740(9)   | 1.745 | 1.134 | C1-S1         | -     | 1.743 | 1.142 |
| C8-S6          | 1.711(8)   | 1.718 | 1.220 | C8-S6         | -     | 1.722 | 1.217 |
| <i>fac-3a</i>  |            |       |       | <i>fac-3b</i> |       |       |       |
|                | Expt.      | Cal.  | WBI   |               | Expt. | Cal.  | WBI   |
| Ru1-B1         | 2.293(3)   | 2.308 | 0.218 | Ru1-B1        | -     | 2.304 | 0.218 |
| Ru1-B2         | 2.276(2)   | 2.293 | 0.228 | Ru1-B2        | -     | 2.306 | 0.217 |
| Ru1-H1B        | 1.69(3)    | 1.703 | 0.241 | Ru1-H1B       | -     | 1.706 | 0.240 |
| Ru1-H2B        | 1.69(3)    | 1.698 | 0.245 | Ru1-H2B       | -     | 1.702 | 0.241 |
| B1-H1B         | 1.29(3)    | 1.363 | 0.578 | B1-H1B        | -     | 1.360 | 0.581 |
| B2-H2B         | 1.37(3)    | 1.370 | 0.571 | B2-H2B        | -     | 1.363 | 0.578 |
| B1-S5          | 1.914(3)   | 1.925 | 0.984 | B1-S5         | -     | 1.929 | 0.976 |
| Ru1-P1         | 2.3071(6)  | 2.416 | 0.503 | Ru1-P1        | -     | 2.393 | 0.488 |
| Ru1-S5         | 2.4184(6)  | 2.436 | 0.369 | Ru1-S5        | -     | 2.427 | 0.383 |
| <i>trans-4</i> |            |       |       | <i>cis-4</i>  |       |       |       |
|                | Expt.      | Cal.  | WBI   |               | Expt. | Cal.  | WBI   |
| Ru1-B1         | 2.172      | 2.173 | 0.369 | Ru1-B1        | -     | 2.149 | 0.368 |
| Ru1-H1         | 1.60(4)    | 1.727 | 0.248 | Ru1-H1        | -     | 1.723 | 0.245 |
| Ru1-H2         | 1.62(4)    | 1.727 | 0.248 | Ru1-H2        | -     | 1.743 | 0.214 |
| B1-H1          | 1.35(4)    | 1.357 | 0.597 | B1-H1         | -     | 1.371 | 0.590 |
| B1-H2          | 1.33(4)    | 1.357 | 0.597 | B1-H2         | -     | 1.360 | 0.624 |
| Ru-S1          | 2.3221(10) | 2.365 | 0.465 | Ru-S1         | -     | 2.365 | 0.512 |
| B1-C1          | 1.580(5)   | 1.589 | 0.895 | B1-C1         | -     | 1.589 | 0.892 |

**Table S2.** Calculated natural charges (q), natural valence population (Pop) and HOMO – LUMO gaps of *mer-2a-b*, *fac-3a-b*, *trans-4* and *cis-4*.

| Compound       | q <sub>Ru1</sub> | q <sub>N1</sub> | q <sub>S3</sub> | q <sub>S1</sub> | q <sub>S6</sub>         | Pop(Ru <sub>val</sub> ) | Pop(N <sub>val</sub> ) | Pop(S <sub>val</sub> ) | ΔE <sub>H-L</sub> (eV) |
|----------------|------------------|-----------------|-----------------|-----------------|-------------------------|-------------------------|------------------------|------------------------|------------------------|
| <i>mer-2a</i>  | 0.171            | -0.516          | -0.027          | 0.047           | 0.064                   | 7.788                   | 5.487                  | 5.994                  | 2.053                  |
| <i>mer-b</i>   | 0.136            | -0.511          | -0.034          | 0.086           | 0.066                   | 7.822                   | 5.481                  | 6.002                  | 1.995                  |
| Compound       | q <sub>Ru</sub>  | q <sub>B</sub>  | q <sub>S</sub>  | q <sub>P</sub>  | Pop(Ru <sub>val</sub> ) | Pop(B <sub>val</sub> )  | Pop(S <sub>val</sub> ) | Pop(P <sub>val</sub> ) | ΔE <sub>H-L</sub> (eV) |
| <i>fac-3a</i>  | -0.429           | 0.029           | 0.070           | 1.131           | 8.408                   | 2.945                   | 5.893                  | 3.849                  | 3.870                  |
| <i>fac-3b</i>  | -0.432           | 0.028           | 0.075           | 1.156           | 8.410                   | 2.945                   | 5.889                  | 3.823                  | 3.952                  |
| <i>trans-4</i> | -0.340           | 0.338           | 0.138           | -               | 8.317                   | 2.631                   | 5.824                  | -                      | 3.143                  |
| <i>cis-4</i>   | -0.330           | 0.333           | 0.149           | -               | 8.313                   | 2.637                   | 5.813                  | -                      | 3.625                  |

**Table S3.** Experimentally observed and calculated <sup>11</sup>B chemical shifts of *fac-3a-b*, *trans-4* and *cis-4*.

| Molecule       |   | <sup>11</sup> B NMR |       |
|----------------|---|---------------------|-------|
|                |   | Exp.                | Cal.  |
| <i>fac-3a</i>  | B | -10.1               | -10.1 |
| <i>fac-3b</i>  | B | -11.5               | -10.8 |
| <i>trans-4</i> | B | 37.4                | 33.5  |
| <i>cis-4</i>   | B | 30.3                | 30.2  |



**Table S4.** Topological parameters at selected bond critical points (BCPs) in *mer-2a-b*, *fac-3a-b*, *trans-4* and *cis-4*.

| Molecule      | BCP            | $\rho$ | $H$    | $\nabla^2\rho$ | $ELF$  | $\epsilon$ |
|---------------|----------------|--------|--------|----------------|--------|------------|
| <i>mer-2a</i> | Ru1-P1         | 0.064  | -0.014 | 0.169          | 0.213  | 0.464      |
|               | Ru1-S1         | 0.198  | -0.167 | -0.463         | 0.934  | 0.069      |
|               | Ru1-N1         | 0.053  | -0.003 | 0.400          | 0.042  | 1.328      |
|               | Ru1-S6         | 0.075  | -0.020 | 0.163          | 0.281  | 0.345      |
| <i>mer-2b</i> | Ru1-P1         | 0.067  | -0.014 | 0.200          | 0.193  | 1.721      |
|               | Ru1-S1         | 0.086  | -0.019 | 0.272          | 0.234  | 0.351      |
|               | Ru1-N1         | 0.025  | -0.002 | 0.141          | 0.026  | 3.414      |
|               | Ru1-S6         | 0.074  | -0.019 | 0.172          | 0.266  | 0.399      |
| <i>fac-3a</i> | Ru1-P1         | 0.074  | -0.020 | 0.185          | 0.241  | 0.142      |
|               | Ru1-S1         | 0.074  | -0.019 | 0.205          | 0.219  | 0.539      |
|               | Ru1-S3         | 0.074  | -0.020 | 0.192          | 0.233  | 0.591      |
|               | Ru1-S5         | 0.046  | -0.007 | 0.220          | 0.069  | 4.716      |
|               | S5-B1          | 0.114  | -0.106 | -0.194         | 0.647  | 0.050      |
|               | S5-B2          | 0.124  | -0.118 | -0.230         | 0.685  | 0.141      |
|               | Ru1-H1B        | 0.068  | -0.011 | 0.645          | 0.034  | 1.704      |
|               | B1-H1B         | 0.055  | -0.027 | 0.362          | 0.037  | 0.031      |
| <i>fac-3b</i> | Ru1-P1         | 0.076  | -0.019 | 0.224          | 0.212  | 0.045      |
|               | Ru1-S1         | 0.075  | -0.019 | 0.204          | 0.225  | 0.476      |
|               | Ru1-S3         | 0.075  | -0.019 | 0.204          | 0.226  | 0.455      |
|               | S5-B1          | 0.116  | -0.109 | -0.171         | 0.591  | 0.162      |
|               | S5-B2          | 0.116  | -0.108 | -0.167         | 0.583  | 0.163      |
|               | Ru1-H1B        | 0.053  | -0.009 | 0.304          | 0.619  | 2.123      |
|               | B1-H1B         | 0.143  | -0.146 | -0.269         | 0.670  | 0.189      |
|               | <i>trans-4</i> | Ru1-S1 | 0.288  | -0.300         | -0.102 | 0.985      |
| Ru1-H1        |                | 0.081  | -0.025 | 0.482          | 0.082  | 0.131      |
| Ru1-H2        |                | 0.081  | -0.025 | 0.482          | 0.082  | 0.131      |
| B1-H1         |                | 0.151  | -0.160 | -0.319         | 0.698  | 0.049      |
| B1-H2         |                | 0.151  | -0.160 | -0.319         | 0.698  | 0.049      |
| <i>cis-4</i>  | Ru1-S1         | 0.085  | -0.023 | 0.189          | 0.306  | 0.182      |
|               | Ru1-S2         | 0.085  | -0.023 | 0.188          | 0.306  | 0.182      |
|               | Ru1-H2         | 0.063  | -0.015 | 0.301          | 0.090  | 0.488      |
|               | B1-H1          | 0.145  | -0.153 | -0.324         | 0.720  | 0.204      |
|               | B2-H2          | 0.147  | -0.154 | -0.329         | 0.726  | 0.199      |

Electron density,  $\rho$ , Total energy density,  $H$ , Laplacian of the electron density,  $\nabla^2\rho$ , Electron localization function,  $ELF$ , Ellipticity,  $\epsilon$  in a.u.

**Table S5.** Electronic transition configurations for *mer-2a-b* by TD-DFT calculations.

| Compounds     | Excited state | Major transition configurations                                                    |
|---------------|---------------|------------------------------------------------------------------------------------|
| <i>mer-2a</i> | 1             | HOMO-6(B)->LUMO(B) (18%), HOMO-5(B)->LUMO(B) (12%), HOMO-3(B)->LUMO(B) (10%)       |
|               | 2             | HOMO-8(B)->LUMO(B) (21%), HOMO-5(B)->LUMO(B) (25%), HOMO-3(B)->LUMO(B) (35%)       |
|               | 3             | HOMO(B)->LUMO(B) (88%)                                                             |
|               | 4             | HOMO-2(B)->LUMO(B) (50%), HOMO-1(B)->LUMO(B) (24%)                                 |
|               | 5             | HOMO-7(A)->LUMO(A) (11%), HOMO-1(A)->LUMO(A) (11%), HOMO-6(B)->LUMO+1(B) (10%)     |
|               | 6             | HOMO-5(B)->LUMO+1(B) (12%), HOMO-3(B)->LUMO+1(B) (12%)                             |
|               | 7             | HOMO(A)->LUMO(A) (49%), HOMO-25(A)->LUMO(A) (4%)                                   |
|               | 8             | HOMO-7(B)->LUMO(B) (13%), HOMO-5(B)->LUMO(B) (10%), HOMO-3(B)->LUMO(B) (16%)       |
|               | 9             | HOMO-7(B)->LUMO(B) (20%), HOMO-6(B)->LUMO(B) (51%)                                 |
|               | 10            | HOMO-7(A)->LUMO+2(A) (11%), HOMO-1(A)->LUMO+2(A) (10%), HOMO-1(B)->LUMO+4(B) (12%) |
| <i>mer-2b</i> | 1             | HOMO-2(B)->LUMO(B) (14%), HOMO-1(B)->LUMO(B) (28%)                                 |
|               | 2             | HOMO-11(B)->LUMO(B) (21%), HOMO-9(B)->LUMO(B) (13%), HOMO-5(B)->LUMO(B) (23%)      |
|               | 3             | HOMO(B)->LUMO(B) (89%)                                                             |
|               | 4             | HOMO-2(B)->LUMO(B) (42%), HOMO-1(B)->LUMO(B) (31%)                                 |
|               | 5             | HOMO-1(A)->LUMO(A) (11%), HOMO-1(B)->LUMO+1(B) (16%)                               |
|               | 6             | HOMO-4(B)->LUMO(B) (16%), HOMO-1(B)->LUMO(B) (20%)                                 |
|               | 7             | HOMO(A)->LUMO(A) (56%), HOMO-25(A)->LUMO(A) (4%)                                   |
|               | 8             | HOMO-8(B)->LUMO(B) (22%), HOMO-6(B)->LUMO(B) (37%), HOMO-2(B)->LUMO(B) (13%)       |
|               | 9             | HOMO-5(B)->LUMO+1(B) (11%)                                                         |
|               | 10            | HOMO-19(A)->LUMO+1(A) (2%)                                                         |

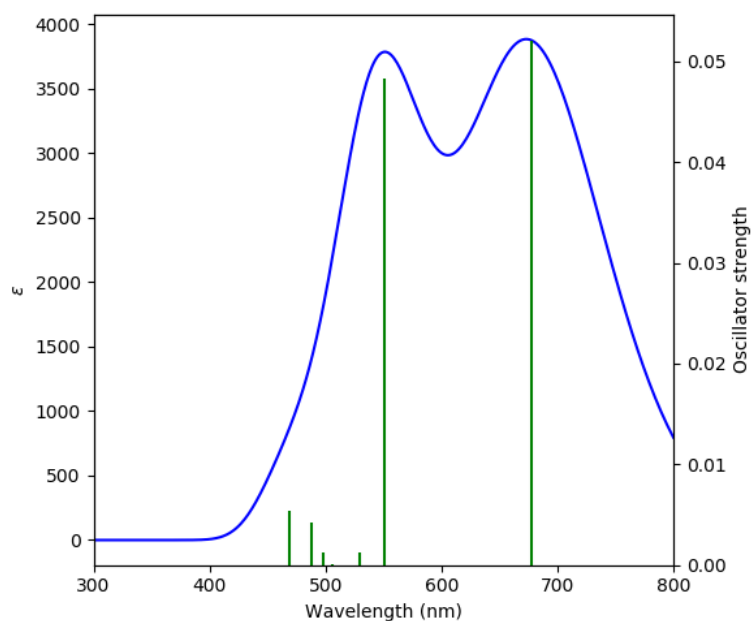

**Figure S36.** Calculated UV-Vis absorption spectra of *mer-2a* at CAM-B3LYP/LANL2DZ/6-31G(d,p) level.

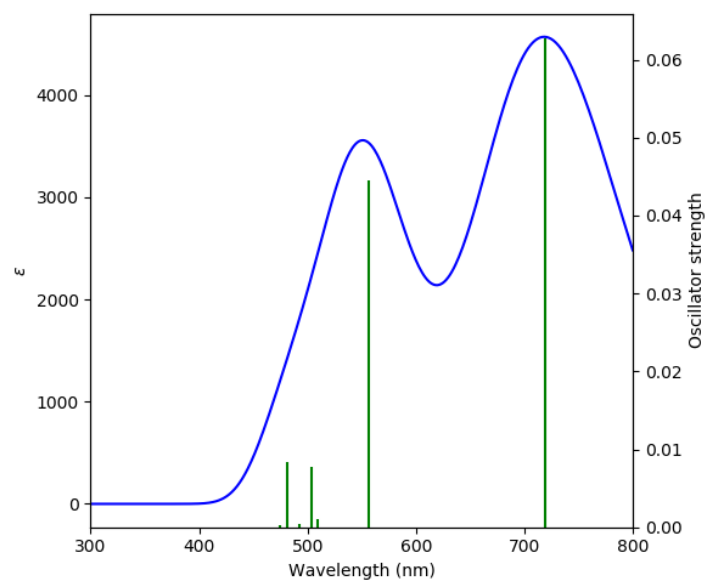

**Figure S37.** Calculated UV-Vis absorption spectra of *mer-2b* at CAM-B3LYP/LANL2DZ/6-31G(d,p) level.

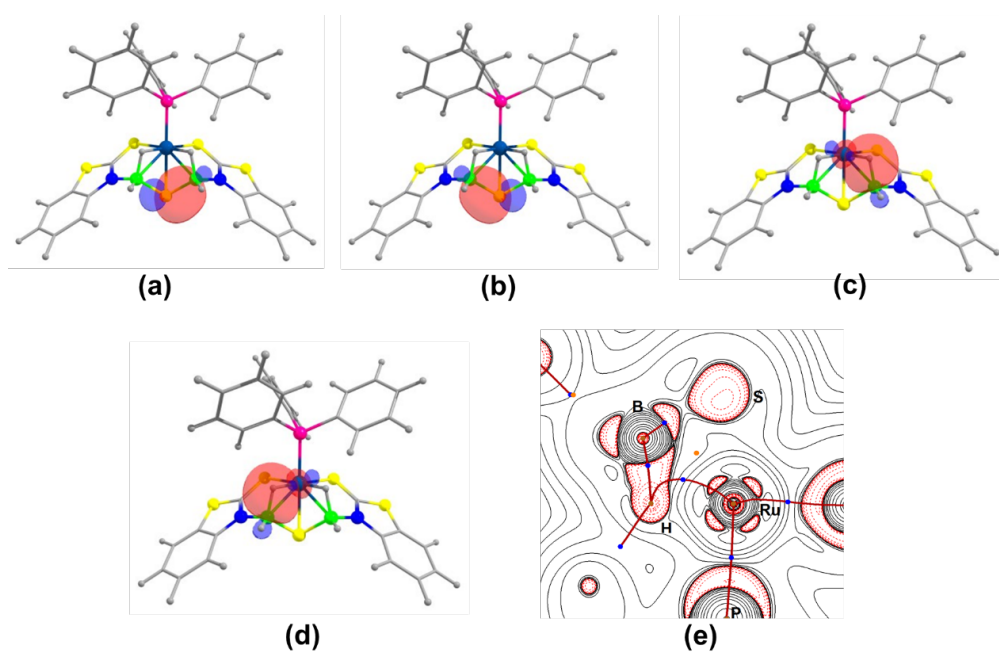

**Figure S38.** Natural bond orbital interaction between B-S bond (a,b) and B-H-Ru (c,d) in *fac-3b* (isovalue  $\pm 0.04$  [ $e/\text{bohr}^3$ ] $^{1/2}$ ); (e) Contour-line map of the Laplacian of the electron density in the Ru-H-B plane of *fac-3a*.

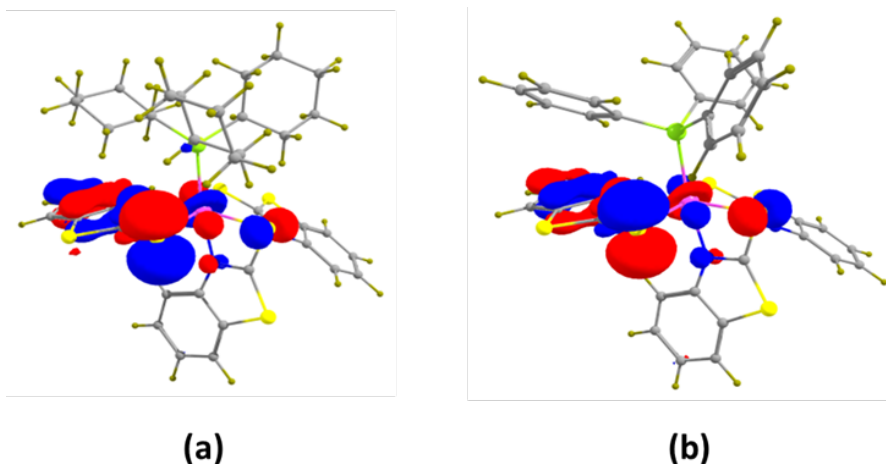

Figure S39. (a) HOMO of oxidised form of *mer-2a* and (b) HOMO of oxidised form of *mer-2a*.

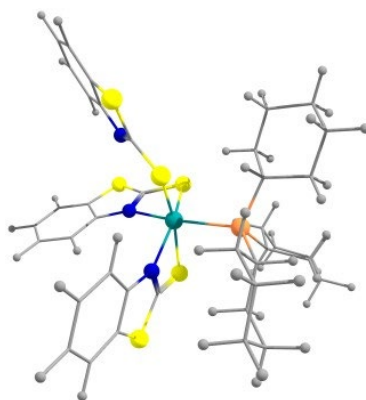

Figure S40. Optimized geometry of *mer-2a*.

Cartesian coordinates for the calculated structure of *mer-2a* (in Å).

|   |             |             |             |   |             |            |             |
|---|-------------|-------------|-------------|---|-------------|------------|-------------|
| C | -2.46501900 | -1.23244600 | -1.34277100 | C | -3.93173500 | 3.72554300 | 0.86062000  |
| C | -4.48878600 | -1.84261700 | -0.69836500 | H | -4.01675900 | 4.62254200 | 0.25435500  |
| C | -5.55474300 | -2.08881000 | 0.17848600  | C | -4.90338000 | 3.45531000 | 1.83421800  |
| H | -5.42542300 | -1.88686900 | 1.23680900  | H | -5.73069600 | 4.14428500 | 1.97614900  |
| C | -6.74598900 | -2.58529600 | -0.33034300 | C | -4.82530000 | 2.31088000 | 2.62257500  |
| H | -7.57708600 | -2.77976300 | 0.34153300  | H | -5.58015000 | 2.10028800 | 3.37376800  |
| C | -6.89366100 | -2.84114800 | -1.70268500 | C | -3.75377300 | 1.44393600 | 2.42034100  |
| H | -7.83578700 | -3.22977500 | -2.07877900 | C | 1.03990500  | 2.64949700 | 0.93008000  |
| C | -5.84989300 | -2.60537000 | -2.59129100 | C | 0.44535600  | 3.01182200 | -1.21934300 |
| H | -5.96775500 | -2.80558100 | -3.65174100 | C | -0.07114700 | 2.76445800 | -2.49708500 |
| C | -4.65093400 | -2.10654400 | -2.08141900 | H | -0.43748400 | 1.77331600 | -2.74338300 |
| C | -1.97725300 | -0.23646800 | 2.23936300  | C | -0.11356000 | 3.80840800 | -3.41434300 |
| C | -2.76805100 | 1.71360600  | 1.44390200  | H | -0.51463600 | 3.62586400 | -4.40698000 |
| C | -2.86162700 | 2.86442400  | 0.65562200  | C | 0.34582400  | 5.08892700 | -3.07943300 |
| H | -2.11020800 | 3.06165600  | -0.10069900 | H | 0.30340600  | 5.88772600 | -3.81377800 |

|   |            |             |             |    |             |             |             |
|---|------------|-------------|-------------|----|-------------|-------------|-------------|
| C | 0.84933900 | 5.35332800  | -1.80852200 | H  | 5.82453200  | -0.19527100 | 2.70046800  |
| H | 1.19572100 | 6.34736000  | -1.54311600 | C  | 4.87906400  | -1.46289900 | 1.22917300  |
| C | 0.89034700 | 4.31208700  | -0.88383800 | H  | 5.32293100  | -0.92086100 | 0.38793400  |
| C | 2.02245300 | -2.64716700 | -0.80830800 | H  | 4.88089800  | -2.52489700 | 0.95716500  |
| H | 1.41942400 | -2.38223800 | -1.68839200 | C  | 3.36042800  | -0.03629400 | -1.32104700 |
| C | 1.16529800 | -3.59755600 | 0.03527600  | H  | 4.22545900  | -0.70163100 | -1.44884700 |
| H | 0.24931200 | -3.09506600 | 0.35707700  | C  | 2.65654900  | 0.08489700  | -2.67723600 |
| H | 1.71203400 | -3.89022200 | 0.94113600  | H  | 2.30630400  | -0.89272300 | -3.02642000 |
| C | 0.80677900 | -4.85704300 | -0.76221000 | H  | 1.76677200  | 0.71474500  | -2.56409500 |
| H | 0.21803000 | -5.53403600 | -0.13202800 | C  | 3.58967100  | 0.69889700  | -3.72802700 |
| H | 0.15847800 | -4.57324400 | -1.60276000 | H  | 4.42317000  | 0.00714400  | -3.91812600 |
| C | 2.05035100 | -5.56864300 | -1.29644900 | H  | 3.05288700  | 0.80656700  | -4.67815100 |
| H | 1.76509400 | -6.43571600 | -1.90422100 | C  | 4.14658200  | 2.04856800  | -3.27253100 |
| H | 2.63712800 | -5.95871400 | -0.45211700 | H  | 3.32420400  | 2.77313900  | -3.20159500 |
| C | 2.92102000 | -4.61110400 | -2.11078600 | H  | 4.84834900  | 2.44190500  | -4.01796400 |
| H | 2.37928600 | -4.30699000 | -3.01756400 | C  | 4.83031600  | 1.92813100  | -1.90962300 |
| H | 3.83607400 | -5.11362000 | -2.44744500 | H  | 5.72253300  | 1.29203500  | -2.00404500 |
| C | 3.28855500 | -3.36055500 | -1.30060100 | H  | 5.18256800  | 2.90920200  | -1.56925300 |
| H | 3.90183300 | -3.66781200 | -0.44422500 | C  | 3.88862900  | 1.32717300  | -0.85924600 |
| H | 3.90979000 | -2.69988600 | -1.91461000 | H  | 3.04498600  | 2.00590400  | -0.69963200 |
| C | 3.44282800 | -0.99934000 | 1.50542800  | H  | 4.41092400  | 1.24323300  | 0.09973100  |
| H | 3.47326000 | 0.05953200  | 1.79740000  | N  | 0.57209100  | 2.10585700  | -0.18138000 |
| C | 2.85267400 | -1.76788800 | 2.69244100  | N  | -1.78923900 | 0.74518600  | 1.38391400  |
| H | 1.83179400 | -1.43225900 | 2.89645400  | N  | -3.25520900 | -1.35475300 | -0.32262800 |
| H | 2.79647900 | -2.83735100 | 2.45098000  | P  | 2.26356500  | -0.90864600 | -0.01240500 |
| C | 3.72180500 | -1.58289500 | 3.94175200  | S  | -0.80151300 | -0.70666400 | -1.39664700 |
| H | 3.29679700 | -2.15584600 | 4.77436300  | S  | -3.17418300 | -1.71240900 | -2.91448100 |
| H | 3.69235100 | -0.52639700 | 4.24254700  | S  | 1.14631200  | 1.63251200  | 2.29858400  |
| C | 5.17146600 | -1.99988900 | 3.68964100  | S  | 1.43046100  | 4.35560800  | 0.78384900  |
| H | 5.78549700 | -1.80888100 | 4.57795000  | S  | -3.39689100 | -0.06342400 | 3.24506100  |
| H | 5.21165500 | -3.08407000 | 3.51038900  | S  | -0.76637700 | -1.45408700 | 2.16513600  |
| C | 5.75097800 | -1.26915900 | 2.47742900  | Ru | 0.07033200  | 0.13238700  | 0.56090500  |
| H | 6.77129100 | -1.61524700 | 2.27156400  |    |             |             |             |

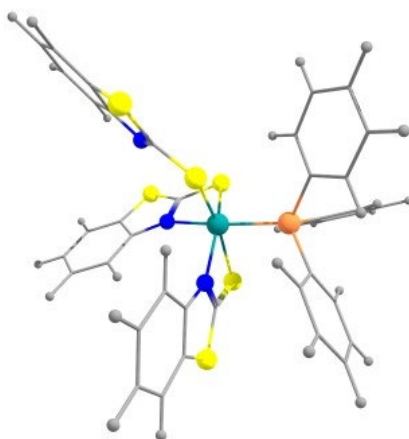

Figure S41. Optimized geometry of *mer-2b*.

Cartesian coordinates for the calculated structure of *mer-2b* (in Å).

|   |             |             |             |    |             |             |             |
|---|-------------|-------------|-------------|----|-------------|-------------|-------------|
| C | 2.47270800  | -1.20418000 | 1.31051200  | S  | -1.30819200 | 1.58771900  | -2.19931200 |
| C | 4.54184800  | -1.65332400 | 0.67771800  | S  | -1.85976500 | 4.12431900  | -0.45113000 |
| C | 5.62574000  | -1.82920800 | -0.19458600 | S  | 3.33259700  | 0.03729100  | -3.23906500 |
| H | 5.47956200  | -1.66723200 | -1.25755700 | S  | 0.75334200  | -1.48750400 | -2.20349400 |
| C | 6.85521400  | -2.20677500 | 0.32471300  | Ru | -0.13679000 | 0.03046800  | -0.56902600 |
| H | 7.70040500  | -2.34603500 | -0.34327200 | C  | -3.59246000 | 0.13561600  | 0.57644300  |
| C | 7.02403200  | -2.41233100 | 1.70332000  | C  | -3.43618000 | 0.65495100  | 1.86667400  |
| H | 7.99638200  | -2.70706300 | 2.08766800  | C  | -4.67892400 | 0.54173700  | -0.20174100 |
| C | 5.96360200  | -2.24487200 | 2.58749100  | C  | -4.37023300 | 1.55153100  | 2.37989900  |
| H | 6.09824900  | -2.40565900 | 3.65263100  | H  | -2.58400500 | 0.36196500  | 2.47319400  |
| C | 4.72569800  | -1.86590100 | 2.06724100  | C  | -5.60863600 | 1.44520200  | 0.31300700  |
| C | 1.92074900  | -0.22186100 | -2.24184900 | H  | -4.79780200 | 0.15694400  | -1.20921500 |
| C | 2.62187800  | 1.74557700  | -1.40203800 | C  | -5.45982500 | 1.94680200  | 1.60393600  |
| C | 2.65709000  | 2.88384900  | -0.59135900 | H  | -4.23933400 | 1.94698100  | 3.38303100  |
| H | 1.89224000  | 3.03039700  | 0.16344200  | H  | -6.44966800 | 1.75628800  | -0.30042800 |
| C | 3.68605500  | 3.79804000  | -0.77598800 | H  | -6.18660400 | 2.64878200  | 2.00335100  |
| H | 3.72700900  | 4.68685400  | -0.15333400 | C  | -3.15773300 | -1.83425600 | -1.57194400 |
| C | 4.67200100  | 3.59233200  | -1.75130100 | C  | -2.73637500 | -1.59566700 | -2.88072800 |
| H | 5.46604500  | 4.32237600  | -1.87702000 | C  | -4.24514300 | -2.68722000 | -1.34398300 |
| C | 4.65008800  | 2.46171400  | -2.56281600 | C  | -3.39727300 | -2.19949200 | -3.95138600 |
| H | 5.41544400  | 2.30274800  | -3.31606100 | H  | -1.88588700 | -0.95021800 | -3.06477200 |
| C | 3.62007800  | 1.54155700  | -2.38128700 | C  | -4.90545300 | -3.28414200 | -2.41437000 |
| C | -1.30225600 | 2.48760800  | -0.74636800 | H  | -4.57247800 | -2.89299900 | -0.32903500 |
| C | -0.76609500 | 2.70028000  | 1.43684000  | C  | -4.48242000 | -3.04071600 | -3.72140600 |
| C | -0.26217700 | 2.37663600  | 2.70176700  | H  | -3.05582700 | -2.00998000 | -4.96501800 |
| H | 0.18079800  | 1.40026400  | 2.86651600  | H  | -5.74765300 | -3.94425700 | -2.22591300 |
| C | -0.33684200 | 3.32693300  | 3.71368200  | H  | -4.99541700 | -3.51057600 | -4.55613900 |
| H | 0.05471500  | 3.08551100  | 4.69762400  | C  | -2.27643500 | -2.47347700 | 1.10259400  |
| C | -0.90292100 | 4.58808300  | 3.48578300  | C  | -1.29463000 | -3.45410200 | 0.92272000  |
| H | -0.94895500 | 5.31404100  | 4.29215700  | C  | -3.22804600 | -2.62873900 | 2.11298300  |
| C | -1.40401300 | 4.92543200  | 2.23137800  | C  | -1.26784100 | -4.57644200 | 1.74593700  |
| H | -1.83890300 | 5.90362000  | 2.05056400  | H  | -0.54526000 | -3.33451900 | 0.14555200  |
| C | -1.32970300 | 3.97777200  | 1.21319100  | C  | -3.19336300 | -3.75217700 | 2.94067800  |
| N | -0.78085800 | 1.89449000  | 0.31256300  | H  | -3.99739500 | -1.87710900 | 2.25923300  |
| N | 1.69039300  | 0.73153400  | -1.36526800 | C  | -2.21509800 | -4.72634900 | 2.75879700  |
| N | 3.27135000  | -1.28531500 | 0.29160100  | H  | -0.49959000 | -5.33035100 | 1.59962600  |
| P | -2.29538100 | -1.03028400 | -0.10360100 | H  | -3.93550100 | -3.86217500 | 3.72675700  |
| S | 0.76892400  | -0.83745500 | 1.35337300  | H  | -2.18854300 | -5.59971100 | 3.40461900  |
| S | 3.22065800  | -1.58016200 | 2.89248800  |    |             |             |             |

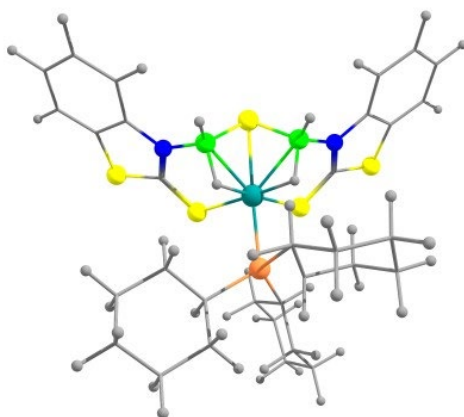

Figure S42. Optimized geometry of *fac-3a*.

Cartesian coordinates for the calculated structure of *fac-3a* (in Å).

|    |             |             |             |   |             |             |             |
|----|-------------|-------------|-------------|---|-------------|-------------|-------------|
| Ru | 0.00038000  | -0.38059300 | -0.27334900 | C | 3.66957300  | -2.98314700 | 0.27822000  |
| S  | -1.77483000 | -0.12654300 | -1.88174600 | C | -0.94938200 | 2.44942200  | 1.76524100  |
| S  | -4.52432200 | -1.35235900 | -1.92354300 | H | -0.76224300 | 3.51593300  | 1.95052500  |
| S  | 1.77706600  | -0.31800700 | -1.89501200 | C | -2.44894200 | 2.26155300  | 1.50152200  |
| S  | 4.35138700  | -1.88343900 | -1.97013000 | H | -2.63802900 | 1.21503500  | 1.22881600  |
| P  | 0.10109600  | 1.98036400  | 0.23337800  | H | -2.77124600 | 2.86777600  | 0.64773300  |
| N  | -2.82128700 | -1.80640200 | -0.03516800 | C | -3.28251700 | 2.63034800  | 2.73440100  |
| N  | 2.63622600  | -2.10233600 | -0.05050700 | H | -3.17816700 | 3.70708100  | 2.93231200  |
| C  | -2.95118200 | -1.11978600 | -1.18707600 | H | -4.34483300 | 2.45436300  | 2.52644700  |
| C  | -4.99948100 | -2.42663700 | -0.62517000 | C | -2.84165300 | 1.84659800  | 3.97129400  |
| C  | -6.20637300 | -3.09996100 | -0.45746300 | H | -3.42613800 | 2.15469200  | 4.84663400  |
| H  | -7.00915700 | -2.99080400 | -1.17984400 | H | -3.04814400 | 0.77848200  | 3.81545200  |
| C  | -6.35365800 | -3.91892300 | 0.65859900  | C | -1.34690500 | 2.03607500  | 4.23304900  |
| H  | -7.28589800 | -4.45458100 | 0.80993400  | H | -1.02899800 | 1.43579700  | 5.09402700  |
| C  | -5.30981100 | -4.06062500 | 1.57972200  | H | -1.15460100 | 3.08629700  | 4.49696400  |
| H  | -5.43884600 | -4.70953900 | 2.44079700  | C | -0.51196900 | 1.65804200  | 3.00475900  |
| C  | -4.10305100 | -3.38915300 | 1.41289200  | H | -0.62291900 | 0.58615400  | 2.79963000  |
| H  | -3.29171700 | -3.50451900 | 2.12169700  | H | 0.55111600  | 1.82246900  | 3.21357500  |
| C  | -3.95030100 | -2.55722800 | 0.30095900  | C | -0.62605900 | 3.08929800  | -1.15881900 |
| H  | -1.68224000 | -2.05154900 | 1.93376300  | H | -1.63287900 | 2.66767700  | -1.28287100 |
| H  | -1.17779800 | -0.46706100 | 0.95334100  | C | -0.76243400 | 4.58376000  | -0.84483700 |
| H  | 1.15121400  | -0.57677600 | 0.96067400  | H | -1.28555600 | 4.74591900  | 0.10462600  |
| H  | 1.49035600  | -2.21038500 | 1.92759200  | H | 0.23539500  | 5.03034700  | -0.74132700 |
| C  | 2.83132800  | -1.44990500 | -1.21349400 | C | -1.50335400 | 5.30929000  | -1.97601300 |
| C  | 4.71127400  | -2.99419700 | -0.66518900 | H | -2.52919900 | 4.92013600  | -2.04198200 |
| C  | 5.82784400  | -3.81066700 | -0.50704900 | H | -1.58869400 | 6.37701100  | -1.73934700 |
| H  | 6.62571100  | -3.81009300 | -1.24297900 | C | -0.79755900 | 5.11283600  | -3.31877600 |
| C  | 5.89101900  | -4.62904300 | 0.61740800  | H | -1.36296700 | 5.60040200  | -4.12201900 |
| H  | 6.75191900  | -5.27479300 | 0.76153600  | H | 0.18432600  | 5.60690700  | -3.28471400 |
| C  | 4.85341000  | -4.62911300 | 1.55619800  | C | -0.60574600 | 3.62716200  | -3.62772100 |
| H  | 4.91537500  | -5.27901900 | 2.42395400  | H | -0.04454900 | 3.49888900  | -4.56088900 |
| C  | 3.73672300  | -3.81496900 | 1.39866700  | H | -1.58642400 | 3.15783500  | -3.78648500 |
| H  | 2.92986100  | -3.82082500 | 2.12171900  | C | 0.11300900  | 2.89466700  | -2.48829300 |

|   |            |            |             |   |             |             |             |
|---|------------|------------|-------------|---|-------------|-------------|-------------|
| H | 1.13968400 | 3.27831200 | -2.40389900 | H | 4.04589400  | 3.33283100  | 3.09290300  |
| H | 0.19664500 | 1.83070700 | -2.72918800 | H | 5.27409400  | 4.05044400  | 2.05707400  |
| C | 1.83993300 | 2.74635900 | 0.57506000  | C | 3.23890500  | 4.61193300  | 1.55580700  |
| H | 2.16929500 | 3.05176400 | -0.42844100 | H | 3.53002700  | 4.97279400  | 0.55890200  |
| C | 2.85661800 | 1.72468300 | 1.09716200  | H | 3.21560700  | 5.49167200  | 2.21069800  |
| H | 2.87298300 | 0.85066300 | 0.44276000  | C | 1.83852700  | 3.99000100  | 1.47706900  |
| H | 2.54693800 | 1.36947300 | 2.08962700  | H | 1.52484000  | 3.70666200  | 2.49032700  |
| C | 4.25836700 | 2.33808600 | 1.18984300  | H | 1.12204700  | 4.73847400  | 1.12713300  |
| H | 4.96080100 | 1.59503100 | 1.58617500  | S | -0.13513800 | -2.80700700 | -0.10188600 |
| H | 4.60687400 | 2.58504700 | 0.17672200  | B | 1.33918800  | -1.92108600 | 0.77234600  |
| C | 4.27365900 | 3.60123200 | 2.05124200  | B | -1.50578400 | -1.77922800 | 0.77727400  |

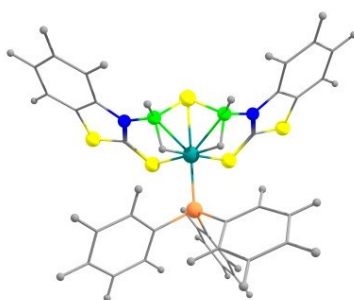

Figure S43. Optimized geometry of *fac-3b*.

Cartesian coordinates for the calculated structure of *fac-3b* (in Å).

|    |             |             |             |   |             |             |             |
|----|-------------|-------------|-------------|---|-------------|-------------|-------------|
| Ru | -0.00751700 | -0.30484400 | -0.20101300 | H | 1.57137900  | -2.05656500 | 2.01702100  |
| S  | -1.80206500 | -0.11335400 | -1.78946300 | C | 2.89032400  | -1.21880500 | -1.10992200 |
| S  | -4.47755800 | -1.49198100 | -1.82865500 | C | 4.85956200  | -2.63610000 | -0.53818900 |
| S  | 1.76848900  | -0.17170100 | -1.81507600 | C | 6.02639800  | -3.37548600 | -0.36490500 |
| S  | 4.44829400  | -1.54244500 | -1.84208600 | H | 6.83506700  | -3.31539900 | -1.08646000 |
| P  | 0.02706900  | 2.04556900  | 0.24808800  | C | 6.12583800  | -4.19547600 | 0.75570900  |
| N  | -2.75221900 | -1.85035100 | 0.06036600  | H | 7.02615500  | -4.78212900 | 0.91122200  |
| N  | 2.71922500  | -1.89108600 | 0.04510200  | C | 5.07460500  | -4.27311200 | 1.67597400  |
| C  | -2.91859900 | -1.17417600 | -1.09349000 | H | 5.16571000  | -4.92367100 | 2.54065400  |
| C  | -4.89558800 | -2.58480900 | -0.52604700 | C | 3.90792200  | -3.53551000 | 1.50367800  |
| C  | -6.06601600 | -3.31903900 | -0.35483400 | H | 3.09093300  | -3.60134800 | 2.21228600  |
| H  | -6.87363200 | -3.25461300 | -1.07719900 | C | 3.80377900  | -2.70224900 | 0.38715200  |
| C  | -6.17034800 | -4.13958000 | 0.76492500  | S | -0.02613400 | -2.72492200 | -0.01063100 |
| H  | -7.07351800 | -4.72222700 | 0.91896600  | B | 1.41143800  | -1.78130100 | 0.85975300  |
| C  | -5.12060300 | -4.22263800 | 1.68646000  | B | -1.44101600 | -1.75456900 | 0.87328700  |
| H  | -5.21595700 | -4.87299300 | 2.55082100  | C | -1.08964900 | 2.56534000  | 1.66701400  |
| C  | -3.95023600 | -3.49049400 | 1.51605600  | C | -2.40105700 | 2.07771200  | 1.68677800  |
| H  | -3.13457200 | -3.55956100 | 2.22582600  | C | -0.66113300 | 3.42655800  | 2.67954700  |
| C  | -3.84098500 | -2.65710600 | 0.40013600  | C | -3.27190000 | 2.44770700  | 2.70830600  |
| H  | -1.59959900 | -2.03267900 | 2.02950800  | H | -2.73571200 | 1.40607100  | 0.90075100  |
| H  | -1.16620400 | -0.43296800 | 1.04572800  | C | -1.53330100 | 3.78761100  | 3.70785100  |
| H  | 1.15720400  | -0.45319400 | 1.03148100  | H | 0.35315200  | 3.81354600  | 2.67082300  |



|   |             |            |             |   |             |            |             |
|---|-------------|------------|-------------|---|-------------|------------|-------------|
| C | -2.83796400 | 3.30040500 | 3.72392300  | H | 4.28636200  | 2.00759900 | 2.82871100  |
| H | -4.28860000 | 2.06450300 | 2.71410000  | H | 5.16049500  | 4.12164900 | 1.85309100  |
| H | -1.18841900 | 4.45150300 | 4.49598700  | C | -0.51855600 | 3.20286300 | -1.13169400 |
| H | -3.51543700 | 3.58197100 | 4.52542300  | C | -1.28835200 | 4.34126000 | -0.87553700 |
| C | 1.69926300  | 2.74596300 | 0.74412600  | C | -0.12644900 | 2.92107500 | -2.44411000 |
| C | 2.18981400  | 3.93744400 | 0.20432500  | C | -1.66238100 | 5.18489200 | -1.92130700 |
| C | 2.46477300  | 2.05556800 | 1.68963500  | H | -1.60093900 | 4.56843700 | 0.13899600  |
| C | 3.43422200  | 4.42796800 | 0.60143500  | C | -0.49666000 | 3.76823200 | -3.48634000 |
| H | 1.60392900  | 4.48171800 | -0.52943900 | H | 0.46910300  | 2.03807100 | -2.65417600 |
| C | 3.70169400  | 2.55235900 | 2.09253700  | C | -1.26737200 | 4.90068600 | -3.22708700 |
| H | 2.09259200  | 1.12577800 | 2.11017000  | H | -2.26535600 | 6.06447800 | -1.71244000 |
| C | 4.19126500  | 3.73862000 | 1.54563400  | H | -0.18796000 | 3.53665300 | -4.50181300 |
| H | 3.80958700  | 5.35142400 | 0.16888200  | H | -1.56249700 | 5.55730400 | -4.04098500 |

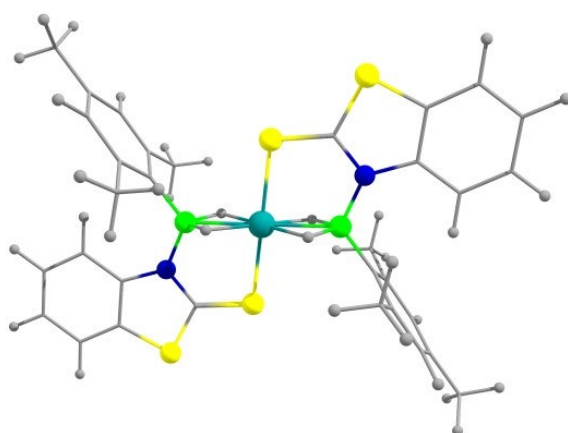

Figure S44. Optimized geometry of *trans-4*.

Cartesian coordinates for the calculated structure of *trans-4* (in Å).

|            |             |             |             |   |             |             |             |
|------------|-------------|-------------|-------------|---|-------------|-------------|-------------|
| Ru         | -0.00000300 | -0.00000100 | -           | H | -2.02642800 | 1.48359600  | -2.73431400 |
| 0.00001700 |             |             |             | C | -5.47262000 | 5.02266900  | -0.00041900 |
| B          | -2.17141400 | 0.08603500  | 0.00001300  | H | -6.54278400 | 4.77986800  | -0.00015800 |
| C          | -3.08783000 | 1.38529200  | -0.00007100 | H | -5.27939100 | 5.63535300  | -0.88610400 |
| C          | -3.48103900 | 1.99472900  | -1.21457800 | H | -5.27904300 | 5.63572500  | 0.88493100  |
| C          | -4.23980700 | 3.16810700  | -1.19502700 | C | -4.20484900 | -1.65190900 | 0.00018000  |
| H          | -4.53282600 | 3.62108100  | -2.14082900 | C | -5.30909800 | -0.79345400 | 0.00034800  |
| C          | -4.63044300 | 3.77415300  | -0.00031500 | H | -5.16976100 | 0.27873900  | 0.00039500  |
| C          | -4.23934600 | 3.16863900  | 1.19452100  | C | -6.58757400 | -1.34286900 | 0.00045800  |
| H          | -4.53200600 | 3.62204700  | 2.14022700  | H | -7.44314700 | -0.67419400 | 0.00058800  |
| C          | -3.48057600 | 1.99527100  | 1.21431800  | C | -6.78999000 | -2.72582700 | 0.00041100  |
| C          | -3.10309900 | 1.40232000  | 2.55014600  | H | -7.79797200 | -3.12934100 | 0.00050000  |
| H          | -3.61910000 | 1.91573600  | 3.36638800  | C | -5.70117000 | -3.59103400 | 0.00026400  |
| H          | -2.02538800 | 1.48482500  | 2.73373300  | H | -5.84074700 | -4.66750300 | 0.00024100  |
| H          | -3.35873500 | 0.33875900  | 2.61451600  | C | -4.42182500 | -3.04196600 | 0.00015500  |
| C          | -3.10406800 | 1.40116600  | -2.55027600 | C | -2.02384900 | -2.39654800 | -0.00000700 |
| H          | -3.62038300 | 1.91419900  | -3.36656300 | S | -0.34330600 | -2.34017600 | -0.00007300 |
| H          | -3.35972100 | 0.33757500  | -2.61405400 | S | -2.90146400 | -3.90615300 | 0.00001100  |

|   |             |             |             |   |            |             |             |
|---|-------------|-------------|-------------|---|------------|-------------|-------------|
| N | -2.83766300 | -1.30874500 | 0.00005400  | H | 6.54281800 | -4.77983400 | -0.00037300 |
| H | -1.34543500 | 0.10925800  | -1.07724400 | H | 5.27917600 | -5.63568700 | 0.88486500  |
| H | -1.34544300 | 0.10924500  | 1.07721900  | H | 5.27934200 | -5.63534900 | -0.88617000 |
| B | 2.17140800  | -0.08603800 | 0.00002600  | C | 4.20484300 | 1.65190500  | 0.00024800  |
| C | 3.08782400  | -1.38529600 | -0.00006300 | C | 5.30909300 | 0.79345000  | 0.00047700  |
| C | 3.48051100  | -1.99533800 | 1.21430600  | H | 5.16975700 | -0.27874300 | 0.00057000  |
| C | 4.23930900  | -3.16869500 | 1.19448400  | C | 6.58756800 | 1.34286500  | 0.00058500  |
| H | 4.53192700  | -3.62214200 | 2.14018400  | H | 7.44314200 | 0.67419000  | 0.00076000  |
| C | 4.63046500  | -3.77413900 | -0.00036000 | C | 6.78998500 | 2.72582300  | 0.00048000  |
| C | 4.23987200  | -3.16803300 | -1.19506400 | H | 7.79796700 | 3.12933800  | 0.00056400  |
| H | 4.53293900  | -3.62096400 | -2.14087200 | C | 5.70116500 | 3.59103000  | 0.00028000  |
| C | 3.48110300  | -1.99466300 | -1.21459000 | H | 5.84074100 | 4.66750000  | 0.00021500  |
| C | 3.10421000  | -1.40100500 | -2.55026600 | C | 4.42182000 | 3.04196200  | 0.00017300  |
| H | 3.62048800  | -1.91404800 | -3.36656700 | C | 2.02384400 | 2.39654500  | 0.00002000  |
| H | 2.02656600  | -1.48330900 | -2.73433100 | S | 0.34330100 | 2.34017300  | -0.00007100 |
| H | 3.35997700  | -0.33743600 | -2.61397900 | S | 2.90145900 | 3.90614900  | -0.00002200 |
| C | 3.10295500  | -1.40248400 | 2.55015700  | N | 2.83765800 | 1.30874100  | 0.00011700  |
| H | 3.61888300  | -1.91598600 | 3.36639400  | H | 1.34540300 | -0.10930000 | 1.07723900  |
| H | 3.35861800  | -0.33893600 | 2.61464200  | H | 1.34546200 | -0.10920900 | -1.07722300 |
| H | 2.02523000  | -1.48497500 | 2.73365700  |   |            |             |             |
| C | 5.47265600  | -5.02264600 | -0.00051600 |   |            |             |             |

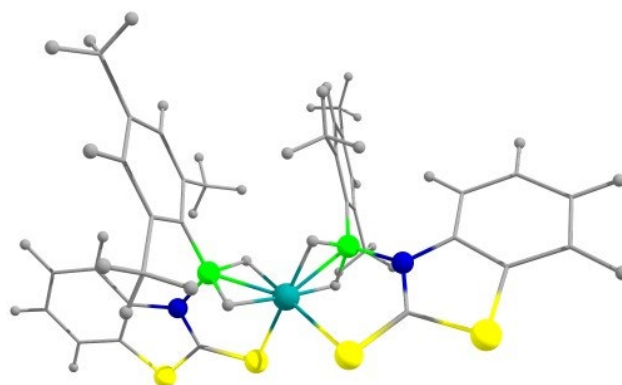

Figure S45. Optimized geometry of *cis-4*.

Cartesian coordinates for the calculated structure of *cis-4* (in Å).

|    |             |             |             |   |             |             |             |
|----|-------------|-------------|-------------|---|-------------|-------------|-------------|
| Ru | -0.00008400 | -1.22653400 | -0.00039500 | S | -1.30233500 | -2.82095400 | -1.14772600 |
| C  | -4.44839400 | -0.59716200 | -0.44272600 | B | -1.88427600 | -0.22629100 | 0.26370800  |
| C  | -5.23394300 | -1.52320400 | -1.15354700 | H | -1.32818400 | -1.16325500 | 1.09636400  |
| C  | -6.60583700 | -1.35442100 | -1.32039000 | H | -0.99915800 | -0.00739300 | -0.74594800 |
| C  | -7.20422400 | -0.23090300 | -0.76037900 | C | 4.44825800  | -0.59757500 | 0.44303100  |
| C  | -6.43469200 | 0.69545100  | -0.05051500 | C | 5.23349500  | -1.52371100 | 1.15407700  |
| C  | -5.06372200 | 0.52753500  | 0.11661000  | C | 6.60536000  | -1.35506000 | 1.32132800  |
| N  | -3.08701200 | -0.95509200 | -0.39549900 | C | 7.20402800  | -0.23159800 | 0.76150800  |
| C  | -2.82952100 | -2.11927800 | -1.03726900 | C | 6.43479600  | 0.69485100  | 0.05143100  |
| S  | -4.24950400 | -2.84012400 | -1.75077800 | C | 5.06385800  | 0.52707200  | -0.11609700 |

|   |             |             |             |   |             |             |             |
|---|-------------|-------------|-------------|---|-------------|-------------|-------------|
| N | 3.08683400  | -0.95536500 | 0.39541300  | H | -2.54998300 | 1.85505200  | -1.62482500 |
| C | 2.82906300  | -2.11953300 | 1.03707900  | H | -2.00691900 | 3.51880300  | -1.38698900 |
| S | 4.24876200  | -2.84054800 | 1.75098400  | H | -0.84624900 | 2.18927700  | -1.31444300 |
| S | 1.30177800  | -2.82109500 | 1.14709100  | C | -2.74094300 | 4.78647500  | 3.33220400  |
| B | 1.88435900  | -0.22645800 | -0.26420700 | H | -3.20481400 | 5.56898500  | 2.72371300  |
| H | 0.99893500  | -0.00750900 | 0.74524800  | H | -3.36672500 | 4.62700300  | 4.21555200  |
| H | 1.32853200  | -1.16311900 | -1.09696900 | H | -1.77737800 | 5.17698600  | 3.68281300  |
| H | -7.18984600 | -2.08333500 | -1.87338700 | C | 2.15486400  | 1.11144700  | -1.07954800 |
| H | -8.27269100 | -0.07671800 | -0.87645500 | C | 2.41357100  | 1.07684800  | -2.47009100 |
| H | -6.91083600 | 1.56916600  | 0.38418700  | C | 2.10849000  | 2.37183300  | -0.43694400 |
| H | -4.48200700 | 1.25177400  | 0.67005600  | C | 2.60954900  | 2.26800700  | -3.17515300 |
| H | 7.18913300  | -2.08404500 | 1.87448300  | C | 2.31187200  | 3.54123600  | -1.17517700 |
| H | 8.27247700  | -0.07752500 | 0.87789500  | C | 2.55726300  | 3.51367600  | -2.54896400 |
| H | 6.91115800  | 1.56852600  | -0.38311400 | H | 2.81595600  | 2.21966900  | -4.24314400 |
| H | 4.48237200  | 1.25138500  | -0.66969300 | H | 2.28242900  | 4.50002600  | -0.65980500 |
| C | -2.15443500 | 1.11149200  | 1.07935700  | C | 1.86651800  | 2.48805500  | 1.04842000  |
| C | -2.41302500 | 1.07672400  | 2.46993100  | H | 2.54962800  | 1.85404200  | 1.62476100  |
| C | -2.10805400 | 2.37196500  | 0.43692200  | H | 2.00784000  | 3.51825500  | 1.38725900  |
| C | -2.60888000 | 2.26779900  | 3.17515700  | H | 0.84620900  | 2.18959800  | 1.31410700  |
| C | -2.31132500 | 3.54128400  | 1.17533300  | C | 2.50428700  | -0.22719800 | -3.22526900 |
| C | -2.55660100 | 3.51355500  | 2.54912900  | H | 3.19582800  | -0.93050000 | -2.74829500 |
| H | -2.81515900 | 2.21934700  | 4.24316700  | H | 1.53040100  | -0.72682700 | -3.28315700 |
| H | -2.28187000 | 4.50013200  | 0.66006800  | H | 2.85467700  | -0.06282200 | -4.24819000 |
| C | -2.50381300 | -0.22741700 | 3.22493200  | C | 2.74171800  | 4.78670100  | -3.33184700 |
| H | -3.19606000 | -0.93027300 | 2.74830600  | H | 3.20517200  | 5.56922900  | -2.72306700 |
| H | -1.53014400 | -0.72754600 | 3.28203200  | H | 3.36792600  | 4.62742500  | -4.21493200 |
| H | -2.85339700 | -0.06307400 | 4.24813300  | H | 1.77824500  | 5.17707500  | -3.68286600 |
| C | -1.86627800 | 2.48841100  | -1.04845900 |   |             |             |             |

### III References

- 1 M. Zafar, R. Ramalakshmi, K. Pathak, A. Ahmad, T. Roisnel, S. Ghosh, *Chem. Eur. J.*, 2019, **25**, 13537-13546.
- 2 K. Smith, A. Pelter, Z. Jin, *Angew. Chem., Int. Ed. Engl.*, 1994, **33**, 851-853.
- 3 G. E. Ryschlewitsch, K. C. Nainan, S. R. Miller, L. J. Todd, W. J. Dewkett, M. Grace, H. Beall, M. F. Hawthorne, R. Leyden, *Inorg. Synth.*, 2007, **15**, 111-118.
- 4 (a) J. J. Led, H. Gesmar, *Chem. Rev.*, 1991, **91**, 1413-1426; (b) L. Yang, R. Simionescu, A. Lough, H. Yan, *Dyes and Pigments*, 2011, **91**, 264-267.
- 5 (a) G. M. Sheldrick, *Acta Cryst.*, 2015, **A71**, 3-8. (b) G. M. Sheldrick, SHELXS97 and SHELXL97, University of Gottingen: Germany, 1997.
- 6 G. M. Sheldrick, *Acta Cryst.*, 2015, **C71**, 3-8.
- 7 O. V. Dolomanov, L. J. Bourhis, R. J. Gildea, J. A. K. Howard, H. Puschmann, *J. Appl. Crystallogr.*, 2009, **42**, 339-341.
- 8 A. D. Becke, A. D. *J. Chem. Phys.*, 1993, **98**, 5648-5652. (b) Perdew, J. P.; Wang, Y. *Physical Review B*, 1992, **45**, 13244-13249.
- 9 Gaussian 09, Revision C.01, M. J. Frisch, G. W. Trucks, H. B. Schlegel, G. E. Scuseria, M. A. Robb, J. R. Cheeseman, G. Scalmani, V. Barone, B. Mennucci, G. A. Petersson, H. Nakatsuji, M. Caricato, X. Li, H. P. Hratchian, A. F. Izmaylov, J. Bloino, G. Zheng, J. L. Sonnenberg, M. Hada, M. Ehara, K. Toyota, R. Fukuda, J. Hasegawa, M. Ishida, T. Nakajima, Y. Honda, O. Kitao, H. Nakai, T. Vreven, J. A. Montgomery, Jr., J. E. Peralta, F. Ogliaro, M. Bearpark, J. J. Heyd, E. Brothers, K. N. Kudin, V. N. Staroverov, T. Keith, R. Kobayashi, J. Normand, K. Raghavachari, A. Rendell, J. C. Burant, S. S. Iyengar, J. Tomasi, M. Cossi, N. Rega, J. M. Millam, M. Klene, J. E. Knox, J. B. Cross, V. Bakken, C. Adamo, J. Jaramillo, R. Gomperts, R. E. Stratmann, O. Yazyev, A. J. Austin, R. Cammi, C. Pomelli, J. W. Ochterski, R. L. Martin, K. Morokuma, V. G. Zakrzewski, G. A. Voth, P. Salvador, J. J. Dannenberg, S. Dapprich, A. D. Daniels, O. Farkas, J. B. Foresman, J. V. Ortiz, J. Cioslowski, D. J. Fox, Gaussian, Inc., Wallingford CT, 2010.
- 10 (a) D. Andrae, U. Häußermann, M. Dolg, H. Stoll, H. Preuß, *Theor. Chim. Acta*, 1990, **77**, 123-141. (b) A. Bergner, M. Dolg, W. chle, H. Stoll, Preu; Heinz Werner *Mol. Phys.*, 1993, **80**, 1431-1441.
- 11 P. C. Hariharan, J. A. Pople, *Theor. Chim. Acta* 1973, **28**, 213-222.
- 12 (a) F. J. London, *J. Phys. Radium* 1937, **8**, 397-409, (b) R. Ditchfield, *Mol. Phys.* 1974, **27**, 789-807, (c) K. Wolinski, J. F. Hinton, P. Pulay, *J. Am. Chem. Soc.*, 1990, **112**, 8251-8260.
- 13 T. P. Onak, H. L. Landesman, R. E. Williams, I. Shapiro, *J. Phys. Chem.*, 1959, **63**, 1533-1535.
- 14 NBO Program 6.0, E. D. Glendening, J. K. A. E. Badenhoop, Reed, J. E. Carpenter, J. A. Bohmann, C. M. Morales, C. R. Landis, F. Weinhold, Theoretical Chemistry Institute, University of Wisconsin, Madison, WI, 2013.
- 15 K. Wiberg, *Tetrahedron*, 1968, **24**, 1083-1096.
- 16 T. Lu, F. Chen, Multiwfn: A multifunctional wavefunction analyzer. *J. Comput. Chem.* 2012, **33**, 580-592.
- 17 Chemcraft - graphical software for visualization of quantum chemistry computations <https://www.chemcraftprog.com>.
